# Supplementary material for: Development of a T-cell activation-related module with predictive value for the prognosis and immune checkpoint blockade therapy response in glioblastoma
Source: PeerJ. 2021 Dec 22;9:e12547. doi: 10.7717/peerj.12547 (PMC8710057; doi:10.7717/peerj.12547)
Supplement: Supplemental Information 12 [file peerj-09-12547-s012.xlsx]

## Sheet: GO_TERM
GO_T_CELL_ACTIVATION	GO_T_CELL_ACTIVATION_VIA_T_CELL_RECEPTOR_CONTACT_WITH_ANTIGEN_BOUND_TO_MHC_MOLECULE_ON_ANTIGEN_PRESENTING_CELL
ADA	LILRB1
CD24	HLA-DMB
MICA	ICAM1
KLRC4-KLRK1	ITGAL
ADAM8	LGALS3
RASGRP1	LGALS9
EBI3	APBB1IP
CDK6	HAVCR2
LILRB2
SIRPB1
BTN2A2
GPNMB
CEBPB
BATF
TNFSF13B
CCR9
HSPH1
LILRB1
MALT1
KDELR1
SPINK5
LILRB4
RIPK3
BTN3A1
CD160
GLMN
HHLA2
CORO1A
DUSP10
TREX1
CD300A
VSIG4
NLRP3
SLAMF6
CGAS
TNFRSF13C
CLC
JAML
CLPTM1
PSMB11
CCR6
CCR7
TMIGD2
MAP3K8
ADORA2A
CR1
SIRPA
CSK
PIK3R6
RC3H1
IL23R
CTLA4
CTNNB1
CTPS1
BTLA
CXADR
CYLD
NKX2-3
CLECL1
CD55
ZFPM1
DDOST
DLG1
AGER
DOCK2
DPP4
DTX1
DUSP3
GPR183
EFNB1
EFNB2
EFNB3
EGR1
EGR3
NLRC3
AIF1
ELF4
TIGIT
EPO
ERBB2
AKT1
F2RL1
FANCA
FANCD2
FCER1G
FCGR2B
FKBP1A
FKBP1B
ZBTB1
KLRK1
FOXJ1
FLOT2
JMJD6
TMEM131L
KIF13B
ICOSLG
NCSTN
PATZ1
IL27
MTOR
ABL1
FUT7
FYN
ZNF683
LRRC32
PTPN22
GATA3
CLEC4E
PLA2G2D
KAT2A
LAT
FOXP1
PRELID1
SIT1
TNFRSF21
GLI2
GLI3
GNRH1
IFNL1
CCDC88B
GPR18
GRB2
DROSHA
PYCARD
CD274
GSN
NCAPH2
ICOS
TBX21
ANXA1
NCKAP1L
HFE
CD209
STOML2
HLA-DMB
HLA-DOA
HLA-DPA1
HLA-DPB1
HLA-E
HLA-G
HLX
HMGB1
AIRE
HES1
HSPD1
ICAM1
CLEC4D
IFNE
CLEC4G
IFNA1
IFNA2
IFNA4
IFNA5
IFNA6
IFNA7
IFNA8
IFNA10
IFNA13
IFNA14
IFNA16
IFNA17
IFNA21
IFNB1
IFNG
IFNW1
IGF1
IGF2
IGFBP2
IHH
IL1B
IL2
IL2RA
IL4
IL4R
IL6
IL6R
IL6ST
IL7
IL7R
IL10
IL12A
IL12B
IL12RB1
IL15
IL18
IDO1
INS
IRF1
IRF4
ITGAL
ITK
ITPKB
JAG2
JAK3
KIT
ARG1
ARG2
RHOA
THEMIS
LAG3
LCK
LCP1
LEP
LEPR
LFNG
LGALS1
LGALS3
LGALS9
LIG4
RHOH
LMO1
LY9
LYN
MIR155
MIR21
MIR27A
MIR30B
SMAD3
SMAD7
CD46
MICB
EIF2AK4
NRARP
TARM1
MSN
MYB
MYH9
NCK1
NEDD4
NFATC2
PNP
P2RX7
PAK1
PAK2
PAK3
PAWR
PAX1
CLEC4A
FOXP3
ZBTB7B
LEF1
PDCD1
IL23A
FAM49B
PDPK1
PIK3CA
PIK3CD
PIK3CG
PIK3R1
PKNOX1
ATP7A
IL20RB
WNT4
SASH3
APBB1IP
RC3H2
DLL4
LAX1
PPP3CA
PPP3CB
SIRPG
CHD7
PRKAR1A
PAG1
PRKCQ
PRKCZ
PRKDC
PRLR
PRNP
METTL3
CYP26B1
PSEN1
B2M
IFNK
DUSP22
PSMB10
TWSG1
PELI1
ZMIZ1
BAD
PTGER4
PREX1
SH3RF1
GPAM
PTPN2
PTPN6
PTPN11
ZP4
SLC46A2
PTPRC
BAX
SELENOK
RAB27A
RAC1
RAC2
RAG1
RAG2
IL21
RARA
BCL2
RELB
BCL3
BCL6
CDH26
RORA
RORC
RPS3
SATB1
CEACAM1
CCL2
CCL5
CCL19
CCL21
XCL1
SDC4
PRDM1
BLM
VSIR
NOD2
SEMA4A
NFKBIZ
AZI2
SFTPD
CLEC7A
PLA2G2F
SHH
2021-03-07
BCL11B
RASAL3
BMP4
SLC11A1
SOD1
SOS1
SOX4
SP3
SPN
SPTA1
SRC
SRF
BRAF
ZFP36L1
STAT3
STAT5B
STAT6
ZFP36L2
STK11
SYK
ADAM17
TCF7
ZEB1
PRDX2
TFRC
TGFB1
TGFBR2
THY1
TNFRSF1B
TRAF6
TSC1
TNFSF4
CCR2
TNFRSF4
SCGB1A1
VAV1
VCAM1
WAS
WNT1
XBP1
YES1
ZAP70
ZBTB16
ZP3
FZD5
NKAP
TNFAIP8L2
VTCN1
NHEJ1
TREML2
ZC3H12A
PDCD1LG2
CD276
PRR7
NDFIP1
CAMK4
DOCK8
EOMES
FZD7
FZD8
CASP3
ITCH
MAD1L1
CASP8
SLA2
NCK2
CARD11
ZC3H8
FOXN1
LOXL3
NFKBID
HAVCR2
AP3B1
CAV1
RUNX2
TNFSF11
RUNX1
RUNX3
CBFB
SOCS1
PDE5A
TNFSF14
TNFSF9
TNFRSF14
RIPK2
FADD
TNFRSF18
IL1RL2
IL18R1
VNN1
BCL10
RAB29
AP3D1
CCND3
TNFSF18
SART1
DNAJA3
CD1C
CD1D
CD2
CD3D
RSAD2
CD3E
CD3G
CD4
CD5
CD6
DLG5
CD7
CD8A
CD8B
SOCS6
CD83
CD27
CD28
GRAP2
CD80
CD86
TNFSF8
ATG5
MAPK8IP1
SOX13
CD40LG
CD44
CD47
SOCS5
CD74
RIPOR2
CD151
TESPA1
MAFB
CDC42

## Sheet: COX_RESULTS
TCGA-GBM	HR	low95	high95	P-value	CGGA325-GBM	HR	low95	high95	P-value
ABL1	0.967738	0.711096	1.31701	0.834777	ABL1	1.00495	0.988145	1.02205	0.565828
ADA	0.932482	0.740051	1.17495	0.553323	ADA	1.02238	0.994689	1.05085	0.114126
ADAM17	1.02221	0.646975	1.61506	0.925025	ADAM17	1.05965	1.01882	1.10212	0.00385042
ADORA2A	0.939916	0.673826	1.31108	0.715176	ADORA2A	1.03948	0.951304	1.13582	0.391949
AIRE	1.08466	0.937145	1.25539	0.2759	AIRE	1.01228	0.885538	1.15716	0.858081
AKT1	1.13029	0.807776	1.58157	0.474897	AKT1	0.998619	0.9914	1.00589	0.708818
ARG1	1.15527	0.993992	1.34271	0.0599152	ARG1	1.25116	0.885284	1.76826	0.204231
ARG2	1.04859	0.768219	1.43128	0.765026	ARG2	0.980581	0.917874	1.04757	0.560827
ATG5	0.952813	0.622373	1.4587	0.823962	ATG5	1.045	0.983242	1.11063	0.156721
B2M	1.05236	0.828305	1.33702	0.676081	B2M	1.00007	0.999981	1.00015	0.129058
BAD	0.942366	0.664938	1.33554	0.738638	BAD	0.999186	0.994156	1.00424	0.751679
BATF	1.15358	0.972	1.36908	0.102055	BATF	1.03209	0.980721	1.08615	0.225279
BAX	1.15185	0.818334	1.62129	0.417643	BAX	1.00379	0.999859	1.00774	0.0588095
BCL10	1.00135	0.585018	1.71398	0.996062	BCL10	1.12137	1.02266	1.22961	0.0148288
BCL11B	1.10036	0.958454	1.26327	0.174594	BCL11B	1.12832	0.964112	1.3205	0.132448
BCL2	0.976357	0.744926	1.27969	0.862383	BCL2	0.986977	0.911793	1.06836	0.745743
BCL3	1.29857	1.08132	1.55948	0.00515967	BCL3	1.00425	0.995154	1.01343	0.361037
BCL6	0.936028	0.737959	1.18726	0.585767	BCL6	1.0005	0.994883	1.00615	0.861048
BLM	1.02154	0.837879	1.24545	0.833115	BLM	1.00324	0.98382	1.02305	0.745435
BMP4	0.98908	0.840442	1.16401	0.894863	BMP4	0.974983	0.898463	1.05802	0.543507
BRAF	1.11897	0.796018	1.57296	0.517651	BRAF	1.00948	0.93897	1.08528	0.798447
BTLA	1.10949	0.899169	1.36901	0.332613	BTLA	1.20454	0.761876	1.9044	0.425878
BTN3A1	0.856893	0.617993	1.18814	0.354362	BTN3A1	1.00102	0.978754	1.0238	0.929034
CARD11	1.07418	0.86631	1.33193	0.514322	CARD11	1.04478	0.939509	1.16186	0.418821
CASP3	1.25961	0.938024	1.69145	0.124889	CASP3	1.02139	1.0025	1.04063	0.0262752
CASP8	1.09759	0.821426	1.4666	0.528893	CASP8	1.0877	1.02897	1.14979	0.00299595
CCND3	0.980671	0.727576	1.32181	0.898032	CCND3	1.00279	0.997199	1.00841	0.328851
CCR6	1.2364	0.964776	1.58449	0.0936138	CCR6	1.54647	0.887554	2.69456	0.123827
CCR7	1.20275	1.0213	1.41642	0.0269234	CCR7	1.17393	0.959651	1.43606	0.118891
CCR9	0.926319	0.692916	1.23834	0.605352	CCR9	1.03592	0.890925	1.20451	0.646455
CD160	0.968657	0.752386	1.24709	0.804884	CD160	1.03226	0.584464	1.82315	0.912874
CD1C	0.991027	0.843306	1.16462	0.912851	CD1C	1.23863	0.976896	1.57049	0.0772339
CD1D	1.18003	0.982389	1.41743	0.0767289	CD1D	1.10052	0.920279	1.31606	0.293913
CD2	1.06198	0.937015	1.2036	0.346487	CD2	1.02282	0.972471	1.07577	0.381009
CD209	0.989741	0.88911	1.10176	0.850486	CD209	1.07287	0.971525	1.1848	0.164718
CD27	1.14833	0.96443	1.36729	0.120371	CD27	1.07782	0.937215	1.23953	0.29335
CD274	1.11473	0.959166	1.29552	0.156685	CD274	1.05316	0.989742	1.12064	0.102137
CD276	1.69622	1.17569	2.44721	0.00472188	CD276	1.00513	1.00127	1.00901	0.00920846
CD28	1.13802	0.966992	1.3393	0.119707	CD28	1.10196	0.919719	1.32032	0.292498
CD3D	1.08503	0.971137	1.21229	0.149204	CD3D	1.01749	0.967023	1.07058	0.504175
CD3E	1.08313	0.936119	1.25324	0.283273	CD3E	1.01352	0.976165	1.05231	0.483277
CD3G	1.09629	0.940327	1.27813	0.24033	CD3G	1.07484	0.830997	1.39023	0.582492
CD4	1.0771	0.87734	1.32234	0.47793	CD4	1.00316	0.995855	1.01051	0.397838
CD40LG	1.18429	0.997393	1.40622	0.0535857	CD40LG	1.12339	0.638858	1.97539	0.686199
CD44	1.16231	0.964981	1.39998	0.113093	CD44	1.00138	1.00007	1.0027	0.0385792
CD46	1.001	0.652855	1.53478	0.996361	CD46	1.01574	0.996883	1.03496	0.102351
CD47	1.16926	0.757295	1.80535	0.480449	CD47	1.01482	1.00228	1.02751	0.020373
CD5	1.1468	0.993436	1.32384	0.0614765	CD5	1.07193	0.899392	1.27757	0.437892
CD55	1.18047	0.935955	1.48885	0.161205	CD55	1.01124	0.98699	1.03608	0.366816
CD6	1.16479	0.980874	1.3832	0.0819082	CD6	1.03991	0.952189	1.13572	0.38409
CD7	1.29795	1.07918	1.56107	0.00562188	CD7	1.00461	0.933069	1.08163	0.902961
CD74	1.11116	0.921147	1.34036	0.270653	CD74	0.99999	0.999919	1.00006	0.78564
CD80	1.01444	0.850228	1.21037	0.873552	CD80	1.27152	0.970841	1.66532	0.0809856
CD83	1.31746	1.00528	1.72658	0.0457057	CD83	0.996858	0.9798	1.01421	0.720852
CD86	1.06278	0.889105	1.27039	0.503586	CD86	1.00029	0.981671	1.01927	0.975577
CD8A	1.07362	0.919025	1.25422	0.370529	CD8A	0.998535	0.964062	1.03424	0.934819
CD8B	1.07914	0.938348	1.24106	0.285594	CD8B	1.03062	0.923832	1.14974	0.588945
CDC42	1.0319	0.701065	1.51887	0.873486	CDC42	1.00535	0.999933	1.0108	0.0529096
CDK6	1.03512	0.896715	1.19489	0.637386	CDK6	1.01557	0.999068	1.03235	0.0645329
CEACAM1	1.0413	0.908506	1.19351	0.560951	CEACAM1	1.02805	0.834405	1.26663	0.795022
CEBPB	1.26142	0.995642	1.59816	0.0543819	CEBPB	1.00425	0.999295	1.00922	0.092885
CTLA4	1.03984	0.903714	1.19647	0.585248	CTLA4	1.17346	0.949858	1.44969	0.138071
CTNNB1	1.03545	0.60785	1.76386	0.898	CTNNB1	1.00467	0.999656	1.00971	0.0679998
CYLD	1.15	0.849159	1.55742	0.366397	CYLD	1.01724	0.980316	1.05555	0.364904
DLG1	0.890447	0.563759	1.40644	0.618817	DLG1	0.995218	0.976095	1.01472	0.628248
DOCK2	1.09256	0.910564	1.31093	0.340996	DOCK2	1.00892	0.979232	1.03951	0.560026
DOCK8	1.0837	0.902727	1.30096	0.388546	DOCK8	1.02396	0.976523	1.0737	0.327882
DPP4	1.03534	0.941672	1.13832	0.472875	DPP4	1.01417	0.975748	1.0541	0.475233
DTX1	1.124	0.919357	1.37419	0.254298	DTX1	0.979103	0.957958	1.00072	0.0579888
DUSP22	1.29132	0.798974	2.08705	0.296606	DUSP22	0.969739	0.935356	1.00539	0.0952636
EBI3	1.02949	0.876479	1.20922	0.723297	EBI3	0.990747	0.958068	1.02454	0.586971
EGR1	1.15869	0.96456	1.39189	0.11542	EGR1	0.999597	0.998348	1.00085	0.527377
EGR3	1.09946	0.941706	1.28364	0.230179	EGR3	0.990709	0.980431	1.00109	0.079346
EIF2AK4	1.15758	0.736434	1.81956	0.525987	EIF2AK4	1.06803	1.02492	1.11297	0.00174546
ELF4	1.17811	0.945033	1.46867	0.145029	ELF4	1.14073	1.06266	1.22453	0.000272138
EOMES	1.09101	0.919016	1.29519	0.319673	EOMES	1.20659	0.853948	1.70485	0.286976
EPO	1.09923	0.945682	1.2777	0.217789	EPO	0.974017	0.80055	1.18507	0.792482
ERBB2	1.18033	0.969422	1.43711	0.0987885	ERBB2	1.00755	0.993615	1.02168	0.289854
FADD	1.28813	0.77069	2.15299	0.333993	FADD	1.04516	1.01115	1.08031	0.00887657
FCER1G	1.18607	0.985257	1.42781	0.0713834	FCER1G	1.00083	0.999623	1.00204	0.177879
FLOT2	1.38557	0.922207	2.08176	0.116401	FLOT2	1.01404	1.00025	1.02802	0.0460022
FOXP1	1.07179	0.834711	1.37621	0.586758	FOXP1	1.01329	0.960822	1.06862	0.626523
FYN	0.958902	0.718498	1.27974	0.775661	FYN	0.999759	0.998184	1.00134	0.764284
GATA3	1.16142	1.0256	1.31523	0.0183563	GATA3	0.996727	0.880673	1.12807	0.958605
GLI2	1.07154	0.916913	1.25224	0.384834	GLI2	1.00948	1.00415	1.01483	0.000479233
GNRH1	0.999606	0.832173	1.20073	0.996637	GNRH1	1.18561	0.97387	1.44339	0.0898518
GPNMB	1.13504	0.987295	1.30489	0.0750344	GPNMB	0.999762	0.998717	1.00081	0.655511
GPR18	1.09845	0.922499	1.30796	0.291764	GPR18	1.37428	0.942429	2.00402	0.0985582
GPR183	1.03898	0.894248	1.20714	0.617326	GPR183	0.99158	0.978556	1.00478	0.210057
GRAP2	1.10116	0.918565	1.32005	0.297546	GRAP2	1.18132	0.986789	1.4142	0.0695089
GRB2	1.37952	0.771721	2.46601	0.277657	GRB2	1.00414	0.996245	1.0121	0.30487
HAVCR2	1.08039	0.915464	1.27503	0.360253	HAVCR2	1.00657	0.993436	1.01989	0.328338
HES1	1.18661	0.91322	1.54183	0.200353	HES1	1.0054	0.992401	1.01856	0.417479
HFE	1.20524	0.987425	1.47111	0.0664259	HFE	1.06466	0.998818	1.13485	0.0543997
HHLA2	0.85242	0.650861	1.1164	0.246029	HHLA2	0.948722	0.453198	1.98605	0.888936
HLA-DMB	1.03063	0.87111	1.21937	0.725076	HLA-DMB	1.00037	0.997015	1.00374	0.828481
HLA-DOA	1.04059	0.877881	1.23346	0.646482	HLA-DOA	0.997308	0.985506	1.00925	0.657153
HLA-DPA1	1.06096	0.8857	1.27091	0.520625	HLA-DPA1	1.00002	0.999378	1.00067	0.947341
HLA-DPB1	1.09433	0.904781	1.3236	0.352948	HLA-DPB1	1.00005	0.998453	1.00165	0.951913
HLA-E	1.18153	0.914316	1.52685	0.202242	HLA-E	1.00016	0.99877	1.00155	0.82088
HLA-G	1.08175	0.941778	1.24253	0.266347	HLA-G	1.42488	0.731173	2.77676	0.298256
HMGB1	0.830909	0.555474	1.24292	0.367293	HMGB1	1.00091	0.999541	1.00228	0.192875
HSPD1	0.729562	0.394286	1.34994	0.315248	HSPD1	1.00509	1.00103	1.00917	0.0139927
ICAM1	1.27484	1.07476	1.51218	0.00531022	ICAM1	1.00029	0.996124	1.00447	0.891922
ICOS	1.10439	0.949151	1.28502	0.198884	ICOS	1.41825	0.751049	2.67816	0.28134
ICOSLG	1.19133	0.980154	1.448	0.0786447	ICOSLG	1.00788	0.981105	1.03539	0.567693
IDO1	1.07455	0.969132	1.19144	0.172315	IDO1	0.972875	0.898128	1.05384	0.500172
IGF1	1.01164	0.86484	1.18337	0.884938	IGF1	0.997907	0.935922	1.064	0.948935
IGF2	1.0576	0.944005	1.18487	0.33404	IGF2	1.00132	0.999641	1.00301	0.123209
IGFBP2	1.20851	1.0567	1.38212	0.00568905	IGFBP2	1.00034	0.999944	1.00073	0.0934416
IL10	1.09016	0.964177	1.23261	0.168278	IL10	1.00026	0.948312	1.05506	0.992259
IL12A	0.985288	0.814772	1.19149	0.878503	IL12A	0.961916	0.784682	1.17918	0.708639
IL12RB1	1.04838	0.869618	1.26389	0.620373	IL12RB1	1.02639	0.910725	1.15674	0.669412
IL15	1.16235	1.00176	1.34869	0.0473522	IL15	1.19031	1.02842	1.37767	0.0195044
IL18	1.07272	0.912475	1.26111	0.395112	IL18	1.01081	0.994965	1.02692	0.182198
IL18R1	1.15227	0.996551	1.33232	0.0557071	IL18R1	1.05103	0.896925	1.2316	0.538423
IL1B	1.10399	0.966155	1.26149	0.145961	IL1B	1.00058	0.996717	1.00446	0.768235
IL23A	1.18606	0.932214	1.50903	0.164922	IL23A	1.0611	0.934088	1.20538	0.361917
IL27	0.978435	0.790274	1.2114	0.841432	IL27	2.53971	1.0813	5.96518	0.0324053
IL2RA	1.02091	0.940875	1.10775	0.619311	IL2RA	1.00185	0.979038	1.0252	0.874762
IL6	1.07084	0.969856	1.18235	0.175629	IL6	1.00437	0.999642	1.00911	0.0701295
IL6R	1.07816	0.876756	1.32583	0.475664	IL6R	1.04565	0.981731	1.11374	0.165417
IL6ST	0.975277	0.806554	1.1793	0.796173	IL6ST	1.00041	0.989771	1.01117	0.939714
IL7	1.1957	1.00522	1.42227	0.0435126	IL7	1.10109	0.982839	1.23358	0.0966438
IL7R	1.00844	0.89741	1.1332	0.887723	IL7R	1.0194	0.982827	1.05734	0.302655
IRF1	1.21017	0.977001	1.499	0.0806561	IRF1	1.00389	0.996026	1.01181	0.333356
IRF4	1.05651	0.865294	1.28998	0.589444	IRF4	1.21733	0.843412	1.75701	0.293548
ITCH	0.562746	0.288387	1.09812	0.0918826	ITCH	0.997862	0.961769	1.03531	0.909337
ITGAL	1.09026	0.925485	1.28437	0.301292	ITGAL	1.02046	0.975776	1.0672	0.375285
ITK	1.14306	0.987279	1.32343	0.073664	ITK	1.03267	0.945471	1.12791	0.475099
JAG2	1.18822	0.926128	1.52449	0.174977	JAG2	1.00341	0.96036	1.04839	0.87905
JAK3	1.1627	0.997186	1.35568	0.054355	JAK3	1.00535	0.969135	1.04292	0.775643
JMJD6	1.37483	0.862288	2.19203	0.181075	JMJD6	1.02534	1.0062	1.04484	0.00925458
KIT	1.01453	0.881343	1.16786	0.840729	KIT	1.00679	0.967482	1.04769	0.73911
KLRK1	0.966686	0.864951	1.08039	0.550384	KLRK1	1.02934	0.996768	1.06298	0.0779623
LAG3	0.934532	0.784415	1.11338	0.44853	LAG3	1.21777	1.08262	1.36978	0.00102838
LAT	1.09526	0.8996	1.33348	0.364818	LAT	1.02035	0.982221	1.05996	0.299852
LAX1	1.13168	0.942085	1.35944	0.186075	LAX1	1.29864	0.812806	2.07486	0.274381
LCK	1.13297	0.984735	1.30351	0.0809933	LCK	1.0353	0.963465	1.11248	0.34442
LCP1	1.1411	0.912141	1.42754	0.248021	LCP1	1.00691	0.998095	1.0158	0.124815
LEF1	1.15745	0.917479	1.46019	0.217409	LEF1	1.00655	1.00129	1.01185	0.0146901
LEPR	1.13424	0.872498	1.47451	0.346694	LEPR	0.906711	0.780204	1.05373	0.201488
LGALS1	1.20304	0.99815	1.45	0.0523159	LGALS1	1.00025	0.999939	1.00056	0.115566
LGALS3	1.15579	1.01883	1.31115	0.0244538	LGALS3	1.0006	0.999369	1.00184	0.338911
LGALS9	1.09733	0.897565	1.34155	0.364996	LGALS9	1.00116	0.997033	1.00531	0.581641
LILRB1	1.1298	0.950967	1.34227	0.165098	LILRB1	1.01194	0.98978	1.03459	0.293492
LILRB4	1.07362	0.900699	1.27973	0.427913	LILRB4	1.00308	0.996746	1.00946	0.341277
LMO1	1.028	0.935153	1.13007	0.567462	LMO1	1.00372	0.99215	1.01543	0.529938
LRRC32	1.28944	1.02612	1.62034	0.0291666	LRRC32	1.00973	0.994118	1.02559	0.223268
LY9	1.11981	0.925252	1.35529	0.245182	LY9	1.18691	0.92916	1.51617	0.170135
LYN	1.07631	0.845933	1.36942	0.54957	LYN	1.00623	0.99251	1.02013	0.375454
MALT1	1.39749	0.969297	2.01484	0.0729878	MALT1	1.05934	1.00861	1.11263	0.0213259
MAP3K8	1.1168	0.938307	1.32925	0.213762	MAP3K8	1.00975	0.987225	1.0328	0.399124
METTL3	0.889786	0.600168	1.31916	0.561081	METTL3	0.994247	0.976787	1.01202	0.523279
MICA	1.18209	0.947729	1.4744	0.13787	MICA	1.03883	1.0038	1.07509	0.0294944
MICB	1.0025	0.837448	1.20009	0.97827	MICB	1.08197	0.96663	1.21106	0.170741
MTOR	0.901878	0.627939	1.29532	0.576086	MTOR	1.01363	0.979494	1.04896	0.438553
MYB	1.00353	0.888728	1.13316	0.95466	MYB	1.22898	1.01141	1.49335	0.0380667
NEDD4	0.555106	0.364534	0.845307	0.00608431	NEDD4	1.00277	0.938804	1.0711	0.934442
NFATC2	1.00561	0.882346	1.1461	0.933131	NFATC2	1.09553	0.981007	1.22341	0.105326
NFKBIZ	1.22288	1.03801	1.44068	0.0161269	NFKBIZ	1.01275	0.997487	1.02825	0.101985
NHEJ1	0.983484	0.638323	1.51529	0.939807	NHEJ1	1.12093	0.974582	1.28926	0.109758
NLRP3	1.04157	0.867921	1.24996	0.661623	NLRP3	0.962977	0.906816	1.02262	0.218505
NOD2	1.1916	1.00214	1.41687	0.0472392	NOD2	1.07858	0.970896	1.1982	0.158669
NRARP	0.920139	0.731312	1.15772	0.477563	NRARP	1.00538	0.981796	1.02952	0.657949
P2RX7	0.907605	0.782566	1.05262	0.199892	P2RX7	0.985585	0.971373	1	0.0500638
PAK1	1.53853	1.10624	2.13974	0.0104712	PAK1	0.991336	0.97811	1.00474	0.204177
PAK2	0.626786	0.330213	1.18972	0.153095	PAK2	1.02792	1.0029	1.05357	0.0284891
PATZ1	0.669073	0.454265	0.985458	0.0419403	PATZ1	0.999149	0.97631	1.02252	0.942478
PDCD1	1.11891	0.939022	1.33326	0.208971	PDCD1	1.45758	1.07445	1.97732	0.0154583
PDCD1LG2	1.03741	0.886032	1.21464	0.648147	PDCD1LG2	1.04844	0.95447	1.15167	0.323469
PDPK1	1.12512	0.796856	1.58861	0.502992	PDPK1	0.985326	0.952455	1.01933	0.393135
PELI1	0.685941	0.476497	0.987446	0.0425678	PELI1	1.02081	0.989503	1.05311	0.194963
PIK3CA	0.759445	0.550278	1.04812	0.0941224	PIK3CA	1.00946	0.961916	1.05935	0.702097
PIK3CD	1.16167	0.966349	1.39648	0.110594	PIK3CD	1.03231	0.986072	1.08072	0.173805
PIK3CG	1.03193	0.87271	1.22019	0.71318	PIK3CG	1.08178	0.951281	1.23018	0.230735
PIK3R1	0.862519	0.67988	1.09422	0.223127	PIK3R1	0.987613	0.979617	0.995675	0.00265575
PNP	1.23541	0.909041	1.67895	0.176803	PNP	1.00594	0.995437	1.01655	0.268847
PRDM1	1.16333	0.908351	1.48989	0.230728	PRDM1	1.02751	0.958002	1.10206	0.447624
PRKAR1A	1.35093	0.799781	2.28189	0.260745	PRKAR1A	0.998818	0.995272	1.00238	0.514732
PRKCQ	0.865971	0.731492	1.02517	0.0946739	PRKCQ	0.924459	0.816346	1.04689	0.215779
PRKCZ	1.03534	0.907878	1.18069	0.604385	PRKCZ	0.983766	0.971205	0.99649	0.0125506
PRKDC	0.922849	0.638888	1.33302	0.668705	PRKDC	1.01025	0.997816	1.02283	0.106568
PRLR	1.09554	0.953619	1.25859	0.197376	PRLR	1.60109	1.12362	2.28146	0.00918653
PSEN1	1.06983	0.625356	1.83021	0.805378	PSEN1	0.997743	0.981325	1.01444	0.789526
PSMB10	1.12072	0.845546	1.48545	0.42787	PSMB10	1.00174	0.992923	1.01063	0.700332
PTGER4	1.13141	0.945353	1.35408	0.178015	PTGER4	1.00357	0.955998	1.05351	0.885625
PTPN11	0.906155	0.678769	1.20971	0.503825	PTPN11	0.996188	0.986361	1.00611	0.450264
PTPN2	1.38199	0.978984	1.95089	0.0658837	PTPN2	1.01641	0.994489	1.03881	0.143424
PTPN22	1.12031	0.951365	1.31925	0.173148	PTPN22	1.13477	0.962175	1.33833	0.13312
PTPN6	1.21453	0.947247	1.55723	0.125374	PTPN6	1.00676	0.999657	1.01392	0.0621699
PTPRC	1.06157	0.893085	1.26184	0.498015	PTPRC	1.01255	0.994722	1.03069	0.168823
RAB27A	1.22583	0.968972	1.55078	0.0896522	RAB27A	1.05011	1.01654	1.0848	0.00318244
RAC1	2.00918	1.06817	3.77916	0.0304214	RAC1	1.00273	0.999561	1.00591	0.0914014
RAC2	1.2217	0.981302	1.52099	0.0732723	RAC2	1.01572	1.00044	1.03125	0.0437342
RAG1	1.05787	0.83068	1.34719	0.648346	RAG1	1.1016	0.793983	1.5284	0.562476
RAG2	1.37333	0.70283	2.68349	0.353308	RAG2	0.997435	0.616519	1.6137	0.991653
RARA	1.29225	0.934311	1.78731	0.121295	RARA	1.00953	0.996622	1.0226	0.148616
RASGRP1	0.91736	0.792428	1.06199	0.248183	RASGRP1	0.951937	0.891641	1.01631	0.14011
RELB	1.35583	1.03229	1.78078	0.0286394	RELB	1.00871	0.987847	1.03001	0.416108
RHOA	0.953155	0.507759	1.78924	0.881305	RHOA	1.00173	0.999471	1.00399	0.133525
RHOH	1.06367	0.868325	1.30295	0.551053	RHOH	1.04296	1.0009	1.08679	0.0451971
RIPK3	1.1014	0.915109	1.32561	0.306967	RIPK3	1.07343	1.00467	1.14689	0.0359201
RORA	0.940126	0.747873	1.1818	0.596849	RORA	0.92444	0.852991	1.00187	0.0555771
RORC	1.08792	0.938318	1.26137	0.264232	RORC	1.78061	0.98558	3.21695	0.0558977
RUNX2	1.10956	0.928575	1.32583	0.25249	RUNX2	1.09011	1.01272	1.17342	0.0216492
RUNX3	1.10734	0.89493	1.37015	0.348076	RUNX3	1.12719	1.01707	1.24924	0.0224512
SART1	1.10313	0.779082	1.56196	0.580174	SART1	1.00144	0.997006	1.00589	0.525757
SATB1	1.01051	0.84295	1.21137	0.910033	SATB1	0.999573	0.985202	1.01415	0.953865
SFTPD	1.0923	0.955726	1.2484	0.195152	SFTPD	0.836421	0.634006	1.10346	0.206393
SHH	1.08127	0.977813	1.19567	0.127828	SHH	1.00483	0.998731	1.01097	0.120832
SIRPA	1.11219	0.801031	1.54422	0.525412	SIRPA	0.993656	0.985529	1.00185	0.128831
SIT1	1.10558	0.953048	1.28252	0.185148	SIT1	1.07025	0.907304	1.26246	0.420446
SLAMF6	1.1433	0.982463	1.33047	0.0834092	SLAMF6	1.08454	0.908811	1.29425	0.36822
SLC11A1	1.23738	1.04624	1.46344	0.012848	SLC11A1	1.00529	1.00092	1.00968	0.0176502
SMAD3	0.950651	0.679021	1.33094	0.768166	SMAD3	0.964378	0.92886	1.00125	0.0581575
SMAD7	1.01707	0.79452	1.30197	0.89311	SMAD7	0.949072	0.889481	1.01265	0.114136
SOCS1	1.25818	1.07275	1.47567	0.00475523	SOCS1	1.00741	0.96598	1.05063	0.730288
SOCS5	0.863318	0.453352	1.64402	0.654717	SOCS5	1.01133	0.942585	1.0851	0.753682
SOD1	1.0803	0.678101	1.72105	0.745127	SOD1	0.999963	0.998529	1.0014	0.960126
SOS1	0.880017	0.586426	1.32059	0.537116	SOS1	0.98612	0.940991	1.03341	0.558694
SOX4	0.901877	0.76856	1.05832	0.205714	SOX4	1.0027	0.999411	1.00601	0.107625
SP3	0.733995	0.389165	1.38437	0.339434	SP3	1.01255	0.993935	1.0315	0.187752
SPN	1.13554	0.925009	1.39398	0.224409	SPN	1.11112	1.00896	1.22363	0.0322551
SRC	1.0028	0.746011	1.34798	0.985217	SRC	1.01195	0.979204	1.0458	0.47898
SRF	1.05953	0.735762	1.52578	0.755956	SRF	1.02251	0.995901	1.04983	0.0979978
STK11	1.07894	0.745724	1.56104	0.686848	STK11	0.995623	0.978221	1.01334	0.625891
SYK	1.09364	0.895293	1.33593	0.380654	SYK	0.997963	0.975907	1.02052	0.858084
TBX21	1.01478	0.865184	1.19025	0.856876	TBX21	1.23645	0.868027	1.76123	0.239655
TCF7	1.09163	0.845738	1.40901	0.500764	TCF7	1.05517	1.00671	1.10597	0.0251812
TGFB1	1.1979	0.885585	1.62037	0.241358	TGFB1	1.0071	0.997208	1.01709	0.160051
TGFBR2	1.10748	0.861817	1.42318	0.424982	TGFBR2	1.00625	0.989386	1.02341	0.469785
THEMIS	1.17916	0.983254	1.4141	0.0754389	THEMIS	0.957174	0.690425	1.32698	0.792854
THY1	1.22496	0.974208	1.54024	0.0825016	THY1	1.00005	0.998478	1.00162	0.951629
TIGIT	1.07708	0.94136	1.23237	0.279881	TIGIT	1.12177	0.898477	1.40055	0.310277
TMIGD2	0.969847	0.871184	1.07968	0.575932	TMIGD2	0.942784	0.850195	1.04546	0.263941
TNFAIP8L2	1.07607	0.903735	1.28126	0.410342	TNFAIP8L2	1.01193	0.980905	1.04394	0.455359
TNFRSF13C	0.852928	0.723757	1.00515	0.0576156	TNFRSF13C	0.771048	0.549271	1.08237	0.132957
TNFRSF18	1.19994	1.04289	1.38065	0.010875	TNFRSF18	1.03444	0.957562	1.11748	0.39017
TNFRSF1B	1.16438	0.959812	1.41254	0.122622	TNFRSF1B	1.00014	0.992143	1.0082	0.973243
TNFRSF21	1.05532	0.820322	1.35763	0.675274	TNFRSF21	0.994313	0.985088	1.00363	0.230524
TNFRSF4	1.05707	0.865699	1.29075	0.585981	TNFRSF4	1.02545	0.949411	1.10758	0.522624
TNFSF13B	1.11235	0.936192	1.32165	0.226121	TNFSF13B	1.00225	0.992952	1.01163	0.636537
TNFSF14	1.20373	1.06089	1.3658	0.00401413	TNFSF14	1.04525	0.974274	1.1214	0.217377
TNFSF18	0.866931	0.723116	1.03935	0.122844	TNFSF18	0.93201	0.82276	1.05577	0.268344
TNFSF4	1.25891	1.05106	1.50787	0.0123898	TNFSF4	1.10499	1.00714	1.21234	0.034825
TNFSF8	1.05306	0.905132	1.22517	0.503238	TNFSF8	1.01867	0.951026	1.09113	0.597749
TNFSF9	1.17098	0.995218	1.37777	0.057145	TNFSF9	0.970002	0.863573	1.08955	0.607507
TRAF6	0.851818	0.643188	1.12812	0.263179	TRAF6	1.00151	0.910398	1.10174	0.97528
TREML2	1.23629	1.05206	1.45278	0.00998475	TREML2	1.31399	1.02237	1.6888	0.0329445
TREX1	1.04905	0.754585	1.45841	0.775767	TREX1	1.00193	0.982762	1.02146	0.845208
TSC1	0.878699	0.65466	1.17941	0.389177	TSC1	1.02478	0.965652	1.08753	0.419524
VAV1	1.13922	0.944508	1.37406	0.172893	VAV1	1.01461	0.985795	1.04427	0.323744
VCAM1	1.03387	0.895469	1.19367	0.64961	VCAM1	1.01074	1.00356	1.01798	0.00332276
VSIG4	1.09154	0.955689	1.24671	0.196481	VSIG4	1.00277	1.00022	1.00532	0.0332337
VTCN1	0.862142	0.739521	1.0051	0.0580875	VTCN1	1.23444	0.810852	1.87931	0.326007
XBP1	1.07051	0.776335	1.47617	0.677669	XBP1	1.0106	1.00202	1.01926	0.0153894
ZAP70	1.21543	1.00193	1.47442	0.0477591	ZAP70	1.03407	0.936031	1.14237	0.509795
ZBTB16	0.993921	0.888611	1.11171	0.915015	ZBTB16	0.980553	0.96794	0.99333	0.00294806
ZC3H12A	1.2806	1.03169	1.58957	0.0249029	ZC3H12A	1.02289	0.997472	1.04897	0.0779257
ZEB1	0.727361	0.545946	0.969059	0.0296544	ZEB1	0.998572	0.993548	1.00362	0.578846
ZMIZ1	0.99323	0.734513	1.34308	0.964809	ZMIZ1	0.987936	0.977052	0.99894	0.0317494

## Sheet: LIST_OF_ABBREVIATIONS
List of abbreviations
CGGA	Chinese Glioma Genome Atlas
TCGA	The Cancer Genome Atlas
GBM	Glioblastoma
LGG	Low grade glioma
ICB	Immune checkpoint blockade
IDH1	Isocitrate dehydrogenase 1
MGMT	O-6-methylguanine-DNA methyltransferase
TCR	T cell receptor
IL-15	Interleukin-15
SLC11A1	Solute carrier family 11 member 1
TNFSF4	TNF superfamily member 4
TREML2	Triggering receptor expressed on myeloid cells like 2
NGS	Next-generation sequencing
PD1	Programmed cell death protein 1
PDL1	Programmed cell death 1 ligand 1
IDO1	Indoleamine 2,3-dioxygenase 1
CTLA4	Cytotoxic T-lymphocyte-associated protein 4
LAG3	Lymphocyte Activating 3
HAVCR2(TIM3)	Hepatitis A virus cellular receptor 2
APC	Antigen-presenting cell
TMIT	Tumor microenvironment immune types
CYT	Cytolytic activity
HR	Hazard ratio
GSEA	Gene set enrichment analysis
ssGSEA	Single sample Gene set enrichment analysis
FDR	False discovery rate
GO	Gene ontology
KEGG	Kyoto Encyclopedia of Genes and Genomes
CNS	Central nervous system
