# Supplementary material for: Development of a T-cell activation-related module with predictive value for the prognosis and immune checkpoint blockade therapy response in glioblastoma
Source: PeerJ. 2021 Dec 22;9:e12547. doi: 10.7717/peerj.12547 (PMC8710057; doi:10.7717/peerj.12547)
Supplement: Supplemental Information 13 [file peerj-09-12547-s013.xlsx]

## Sheet: GO and KEGG pathways analyses
GO_terms	Description	pvalue	FDR	KEGG_pathways	Description	pvalue	FDR
GO:0042110	T cell activation	5.66e-27	3.65e-24	hsa04060	Cytokine-cytokine receptor interaction	1.62e-13	2.22e-11
GO:0050727	regulation of inflammatory response	7.05e-17	9.74e-15	hsa04061	Viral protein interaction with cytokine and cytokine receptor	3.99e-11	2.73e-09
GO:0045088	regulation of innate immune response	1.56e-13	1.44e-11	hsa04142	Lysosome	1.05e-10	4.79e-09
GO:0050863	regulation of T cell activation	7.94e-21	2.19e-18	hsa04064	NF-kappa B signaling pathway	1.67e-10	5.73e-09
GO:0060326	cell chemotaxis	3.23e-21	9.85e-19	hsa04210	Apoptosis	2.67e-06	7.3e-05
GO:0002685	regulation of leukocyte migration	6.79e-20	1.64e-17	hsa04010	MAPK signaling pathway	1.64e-05	0.000374364
GO:0042098	T cell proliferation	1.32e-15	1.5e-13	hsa04062	Chemokine signaling pathway	0.000374134	0.00569515
GO:0034341	response to interferon-gamma	6.57e-12	4.54e-10	hsa04066	HIF-1 signaling pathway	0.000528777	0.00724424
GO:0071706	tumor necrosis factor superfamily cytokine production	1.92e-14	1.99e-12	hsa04115	p53 signaling pathway	0.00138269	0.0172207
GO:0002819	regulation of adaptive immune response	8.65e-11	4.69e-09	hsa04151	PI3K-Akt signaling pathway	0.00161193	0.0184029

## Sheet: TCGA-seq GBM GSEA result
ID	Description	NES	pvalue	FDR
GO:0006954	inflammatory response	1.12427	0.00019996	0.0989802
GO:0042110	T cell activation	1.06588	0.0425915	0.752957
GO:0050776	regulation of immune response	1.06821	0.00559888	0.335933
GO:0060326	cell chemotaxis	1.15148	0.00079984	0.230954
GO:0071346	cellular response to interferon-gamma	1.08965	0.0757848	0.958811

## Sheet: CGGA325-seq GBM GSEA result
ID	Description	NES	pvalue	FDR
GO:0006954	inflammatory response	1.45707	0.00019996	0.00502615
GO:0042110	T cell activation	1.11959	0.0583883	0.23631
GO:0060326	cell chemotaxis	1.38304	0.00019996	0.00502615
GO:0071346	cellular response to interferon-gamma	1.19517	0.0475905	0.2105
GO:0002286	T cell activation involved in immune response	1.34501	0.0127974	0.0948285

## Sheet: CGGA693-seq GBM GSEA result
ID	Description	NES	pvalue	FDR
GO:0006954	inflammatory response	2.21352	0.00019996	0.0029857
GO:0042110	T cell activation	1.59982	0.00019996	0.0029857
GO:0060326	cell chemotaxis	1.968	0.00019996	0.0029857
GO:0071346	cellular response to interferon-gamma	2.29329	0.00019996	0.0029857
GO:0002286	T cell activation involved in immune response	1.93782	0.000402091	0.00490282

## Sheet: GSE16011 GBM GSEA result
ID	Description	NES	pvalue	FDR
GO:0006954	inflammatory response	1.428	0.00019996	0.0064298
GO:0042110	T cell activation	1.29288	0.00039992	0.00840587
GO:0050776	regulation of immune response	1.32542	0.00019996	0.0064298
GO:0060326	cell chemotaxis	1.37692	0.00039992	0.00840587
GO:0071346	cellular response to interferon-gamma	1.29117	0.00279944	0.0340565
