# Supplementary material for: Development of a T-cell activation-related module with predictive value for the prognosis and immune checkpoint blockade therapy response in glioblastoma
Source: PeerJ. 2021 Dec 22;9:e12547. doi: 10.7717/peerj.12547 (PMC8710057; doi:10.7717/peerj.12547)
Supplement: Supplemental Information 14 [file peerj-09-12547-s014.xlsx]

## Sheet: TCGA
SAMPLE	TIDE_results	Risk Score	standard Risk Score	Priming Score	standard Priming Score	Therapy Score
TCGA-19-2619-01	nonResponse	11.5736	0.633091	0.167473	0.269302	-2.9038
TCGA-02-0055-01	Response	13.2158	1	0.344651	0.676202	-2.64929
TCGA-76-4928-01	nonResponse	12.698	0.884324	0.302064	0.578398	-2.53555
TCGA-19-2625-01	nonResponse	11.6011	0.639229	0.213242	0.374412	-2.27392
TCGA-14-0871-01	nonResponse	9.89896	0.258919	0.0502106	0	-2.23638
TCGA-06-2562-01	nonResponse	12.4447	0.827726	0.324524	0.62998	-1.84706
TCGA-06-0644-01	nonResponse	12.6346	0.870144	0.356325	0.703012	-1.65222
TCGA-28-2509-01	nonResponse	11.7192	0.665616	0.268305	0.50087	-1.63704
TCGA-12-0821-01	nonResponse	10.2327	0.333483	0.128627	0.180088	-1.5648
TCGA-28-5218-01	nonResponse	12.4273	0.823842	0.342427	0.671094	-1.56068
TCGA-06-0210-01	Response	12.391	0.815728	0.343482	0.673519	-1.49361
TCGA-06-0747-01	nonResponse	10.8861	0.479468	0.197187	0.337541	-1.49182
TCGA-14-0781-01	nonResponse	12.2451	0.78313	0.33145	0.645885	-1.46202
TCGA-06-1804-01	Response	10.7722	0.45403	0.192198	0.326085	-1.40283
TCGA-27-1830-01	nonResponse	11.5028	0.617266	0.269967	0.504686	-1.30504
TCGA-27-2524-01	nonResponse	12.1259	0.756481	0.333917	0.651552	-1.25635
TCGA-06-0190-01	nonResponse	12.426	0.823541	0.365796	0.724765	-1.21719
TCGA-08-0386-01	nonResponse	10.0987	0.303554	0.140662	0.207727	-1.19842
TCGA-26-5133-01	nonResponse	9.56777	0.184922	0.0938435	0.100206	-1.12771
TCGA-06-0745-01	nonResponse	11.5438	0.626441	0.287667	0.545336	-1.10472
TCGA-06-2559-01	nonResponse	10.9799	0.500428	0.236251	0.427255	-1.05424
TCGA-26-5132-01	nonResponse	10.8944	0.481338	0.230091	0.413109	-1.02278
TCGA-06-0125-01	nonResponse	10.3841	0.367316	0.180825	0.299964	-1.0172
TCGA-28-5209-01	nonResponse	10.4407	0.379954	0.187431	0.315137	-1.00107
TCGA-02-0047-01	Response	11.6329	0.646337	0.306304	0.588137	-0.958953
TCGA-27-2521-01	nonResponse	9.40766	0.149148	0.0902191	0.0918824	-0.953007
TCGA-06-5412-01	Response	12.5619	0.853904	0.4014	0.806531	-0.890049
TCGA-12-0619-01	nonResponse	11.9573	0.718824	0.342912	0.672208	-0.885229
TCGA-06-5408-01	nonResponse	10.7566	0.450556	0.232348	0.418291	-0.793899
TCGA-32-2615-01	nonResponse	11.7894	0.681297	0.332984	0.649409	-0.791499
TCGA-76-4931-01	nonResponse	10.3042	0.34947	0.189401	0.319661	-0.778267
TCGA-19-1390-01	nonResponse	9.74935	0.225492	0.137024	0.199372	-0.754787
TCGA-06-5416-01	nonResponse	9.15937	0.0936716	0.0802358	0.068955	-0.745857
TCGA-12-3652-01	nonResponse	9.86414	0.251141	0.151379	0.23234	-0.708212
TCGA-06-0141-01	nonResponse	12.3481	0.806133	0.393957	0.789438	-0.694806
TCGA-06-0878-01	Response	11.9105	0.708357	0.352692	0.694669	-0.675667
TCGA-41-2571-01	nonResponse	10.4391	0.379613	0.210197	0.36742	-0.666154
TCGA-02-2483-01	nonResponse	10.5991	0.415365	0.227275	0.406641	-0.644077
TCGA-06-0174-01	nonResponse	10.1482	0.314604	0.183982	0.307216	-0.635577
TCGA-19-5960-01	nonResponse	9.26312	0.116852	0.0981924	0.110194	-0.63093
TCGA-41-3915-01	nonResponse	11.6497	0.650096	0.334825	0.653636	-0.566027
TCGA-06-0750-01	nonResponse	11.5314	0.623657	0.327852	0.637623	-0.499668
TCGA-27-1832-01	nonResponse	12.035	0.736178	0.376884	0.750227	-0.499142
TCGA-15-0742-01	nonResponse	9.96987	0.274765	0.176171	0.289276	-0.496198
TCGA-14-0790-01	nonResponse	9.59278	0.19051	0.141594	0.209868	-0.465357
TCGA-19-2620-01	Response	10.759	0.451077	0.255093	0.470528	-0.464763
TCGA-06-5856-01	nonResponse	11.0287	0.511351	0.281569	0.531331	-0.461393
TCGA-14-1825-01	nonResponse	9.86829	0.252067	0.170176	0.275509	-0.43936
TCGA-28-2513-01	Response	12.1654	0.765307	0.394906	0.791617	-0.421108
TCGA-26-5135-01	nonResponse	11.1661	0.542038	0.302474	0.579341	-0.35115
TCGA-32-2634-01	nonResponse	9.94469	0.269138	0.184241	0.30781	-0.342436
TCGA-12-0618-01	nonResponse	9.24078	0.111861	0.115852	0.150751	-0.341052
TCGA-19-4065-01	Response	12.0989	0.750452	0.39433	0.790295	-0.334977
TCGA-06-5413-01	Response	11.1083	0.529118	0.299552	0.57263	-0.311631
TCGA-06-5418-01	nonResponse	11.1646	0.541701	0.309449	0.595358	-0.247064
TCGA-32-2638-01	Response	11.5211	0.621351	0.346226	0.679819	-0.216446
TCGA-06-0130-01	nonResponse	12.9426	0.938971	0.485643	1	-0.200148
TCGA-27-1835-01	nonResponse	9.0768	0.0752236	0.110121	0.137589	-0.191644
TCGA-06-5410-01	Response	12.8213	0.911868	0.475694	0.977152	-0.173071
TCGA-14-0789-01	Response	11.8734	0.700066	0.384168	0.766957	-0.162845
TCGA-76-4925-01	nonResponse	9.98225	0.27753	0.200274	0.34463	-0.161511
TCGA-14-1829-01	nonResponse	10.9664	0.497432	0.296499	0.56562	-0.154587
TCGA-76-4926-01	nonResponse	10.0401	0.290466	0.207139	0.360397	-0.143496
TCGA-76-4929-01	nonResponse	10.2912	0.346564	0.232486	0.418609	-0.130041
TCGA-26-5134-01	nonResponse	10.044	0.291319	0.208628	0.363817	-0.127152
TCGA-06-0743-01	nonResponse	10.6575	0.428402	0.268627	0.501608	-0.122652
TCGA-06-2563-01	nonResponse	10.6883	0.435295	0.271802	0.508901	-0.120106
TCGA-28-5215-01	nonResponse	11.2114	0.552164	0.325317	0.631802	-0.0817187
TCGA-06-0211-01	nonResponse	10.7911	0.458263	0.285136	0.539523	-0.0713958
TCGA-12-5299-01	nonResponse	10.9281	0.488861	0.298658	0.570577	-0.0684908
TCGA-06-5415-01	nonResponse	9.79715	0.236171	0.191731	0.32501	-0.0231579
TCGA-28-1753-01	nonResponse	11.4126	0.597111	0.349044	0.686291	-0.0209841
TCGA-06-0219-01	nonResponse	10.9511	0.494006	0.304635	0.584303	-0.0138765
TCGA-06-0157-01	nonResponse	10.7919	0.458429	0.290672	0.552238	0.00846959
TCGA-26-5139-01	nonResponse	11.0119	0.507593	0.313571	0.604826	0.0302624
TCGA-06-5858-01	Response	11.1031	0.527955	0.323125	0.626767	0.0403177
TCGA-06-0138-01	Response	11.2175	0.553527	0.335631	0.655489	0.0603594
TCGA-41-2572-01	nonResponse	10.5121	0.395906	0.270641	0.506234	0.113604
TCGA-28-2514-01	nonResponse	9.88103	0.254913	0.209958	0.36687	0.123971
TCGA-27-2528-01	nonResponse	9.24273	0.112297	0.148272	0.225206	0.130032
TCGA-06-0744-01	nonResponse	10.1614	0.317563	0.239476	0.43466	0.156684
TCGA-41-5651-01	nonResponse	9.06073	0.0716315	0.132929	0.189969	0.164577
TCGA-28-5213-01	Response	11.9402	0.714999	0.413983	0.83543	0.177897
TCGA-32-4213-01	nonResponse	11.449	0.605251	0.366522	0.726432	0.182674
TCGA-28-5216-01	nonResponse	10.3344	0.356203	0.260636	0.483256	0.220045
TCGA-27-2523-01	nonResponse	9.78914	0.234384	0.209187	0.365101	0.243368
TCGA-32-1982-01	nonResponse	11.1862	0.546524	0.345183	0.677425	0.244532
TCGA-02-2486-01	Response	12.2029	0.773686	0.444654	0.905867	0.25268
TCGA-06-2561-01	Response	11.266	0.564364	0.353561	0.696666	0.25345
TCGA-06-5411-01	Response	10.5098	0.395404	0.280101	0.52796	0.255071
TCGA-06-2567-01	Response	11.0218	0.509805	0.330386	0.643443	0.261954
TCGA-06-5417-01	nonResponse	8.74013	0	0.110674	0.138858	0.295175
TCGA-12-3650-01	nonResponse	10.1435	0.313557	0.247708	0.453566	0.302501
TCGA-16-1045-01	Response	11.6469	0.649459	0.394133	0.789842	0.304882
TCGA-32-1970-01	Response	9.8692	0.252271	0.224596	0.400489	0.354742
TCGA-28-5208-01	nonResponse	10.6118	0.418184	0.299971	0.573592	0.400503
TCGA-06-0168-01	Response	11.2978	0.571475	0.367132	0.727833	0.406546
TCGA-06-2565-01	Response	9.82232	0.241796	0.223815	0.398695	0.40999
TCGA-12-1597-01	nonResponse	10.0234	0.286714	0.247766	0.453701	0.474195
TCGA-12-5295-01	nonResponse	10.7827	0.456388	0.322565	0.62548	0.487595
TCGA-27-1831-01	nonResponse	10.7553	0.450245	0.319898	0.619357	0.487721
TCGA-32-2616-01	Response	10.5837	0.41192	0.303394	0.581454	0.490406
TCGA-12-0616-01	nonResponse	10.3586	0.361622	0.282239	0.53287	0.501316
TCGA-76-4932-01	nonResponse	10.1038	0.304689	0.257457	0.475955	0.501428
TCGA-19-1787-01	nonResponse	11.0942	0.525973	0.354366	0.698513	0.509535
TCGA-02-2485-01	Response	9.55706	0.182529	0.205229	0.356011	0.515533
TCGA-06-2558-01	Response	10.1603	0.31731	0.264703	0.492597	0.527023
TCGA-14-0787-01	nonResponse	10.6987	0.437605	0.319437	0.618298	0.561427
TCGA-06-0646-01	Response	11.4795	0.61207	0.395811	0.793695	0.56736
TCGA-06-0649-01	Response	11.1419	0.536644	0.36321	0.718825	0.570898
TCGA-32-2632-01	nonResponse	11.6556	0.651415	0.414591	0.836824	0.591442
TCGA-06-0645-01	Response	11.9326	0.713295	0.443899	0.904132	0.625988
TCGA-14-1823-01	Response	11.4507	0.605632	0.397277	0.797062	0.629758
TCGA-14-1034-01	Response	10.9832	0.501181	0.35387	0.697376	0.660083
TCGA-06-5414-01	Response	11.0221	0.509857	0.361571	0.71506	0.71741
TCGA-06-2564-01	Response	10.5928	0.413946	0.320636	0.62105	0.729514
TCGA-06-0187-01	Response	10.5335	0.400704	0.315631	0.609558	0.74065
TCGA-32-5222-01	Response	10.8163	0.463888	0.348147	0.684231	0.813764
TCGA-28-5220-01	Response	10.1538	0.31585	0.287279	0.544443	0.866277
TCGA-76-4927-01	nonResponse	10.749	0.448838	0.3474	0.682516	0.898635
TCGA-06-0686-01	nonResponse	9.95919	0.272377	0.270711	0.506394	0.900793
TCGA-28-5204-01	nonResponse	10.1145	0.307081	0.286229	0.542033	0.906746
TCGA-28-2499-01	Response	10.0991	0.303643	0.285278	0.539849	0.914727
TCGA-06-0158-01	Response	10.9368	0.490797	0.367368	0.728375	0.923458
TCGA-06-0184-01	Response	11.2513	0.561074	0.398814	0.800593	0.935804
TCGA-12-3653-01	Response	10.1179	0.307848	0.289354	0.54921	0.947537
TCGA-14-2554-01	Response	10.5339	0.400792	0.331467	0.645924	0.971533
TCGA-06-2570-01	Response	10.3199	0.352975	0.311671	0.600462	0.986518
TCGA-26-1442-01	Response	9.06779	0.0732091	0.193127	0.328218	1.03439
TCGA-19-2629-01	Response	10.3643	0.362881	0.320241	0.620144	1.04873
TCGA-06-0882-01	Response	11.2951	0.570864	0.412082	0.831064	1.06743
TCGA-28-5207-01	nonResponse	9.57562	0.186675	0.246877	0.451658	1.09787
TCGA-14-0817-01	Response	11.1723	0.543415	0.405751	0.816523	1.14958
TCGA-32-1980-01	nonResponse	11.0353	0.512807	0.402273	0.808536	1.29355
TCGA-26-5136-01	Response	10.5619	0.407039	0.356614	0.703677	1.29933
TCGA-27-2519-01	Response	10.7851	0.45691	0.382159	0.762342	1.3553
TCGA-06-0178-01	nonResponse	9.94505	0.269218	0.305338	0.585919	1.42701
TCGA-06-5859-01	Response	9.80991	0.239023	0.293817	0.559458	1.45078
TCGA-06-0749-01	Response	10.4162	0.374495	0.35679	0.704081	1.50902
TCGA-06-0238-01	Response	10.2616	0.339947	0.347368	0.682443	1.59118
TCGA-27-2526-01	Response	9.55283	0.181583	0.288069	0.546259	1.73234
TCGA-06-0132-01	nonResponse	10.861	0.47386	0.418312	0.845371	1.77584
TCGA-15-1444-01	Response	9.75098	0.225856	0.311831	0.600829	1.79787
TCGA-27-1837-01	nonResponse	9.95129	0.270612	0.333426	0.650423	1.82867
TCGA-06-2557-01	nonResponse	10.9562	0.495144	0.43181	0.87637	1.83767
TCGA-28-1747-01	Response	10.3212	0.353256	0.372161	0.739382	1.86886
TCGA-16-0846-01	nonResponse	10.3111	0.351	0.375179	0.746312	1.92731
TCGA-27-1834-01	Response	10.2572	0.338954	0.375385	0.746785	2.00699
TCGA-06-0129-01	Response	9.96424	0.273506	0.359973	0.711392	2.19826

## Sheet: CGGA_325
SAMPLE	TIDE_results	Risk Score	standard Risk Score	Priming Score	standard Priming Score	Therapy Score
CGGA_D38	nonResponse	44.99	0.282133	0.0393335	0	-2.67691
CGGA_1343	nonResponse	80.4658	0.529683	0.171059	0.303766	-2.41612
CGGA_D32	nonResponse	106.686	0.712648	0.264705	0.519719	-2.26308
CGGA_1060	nonResponse	59.6335	0.384315	0.132235	0.214235	-2.15708
CGGA_D36	nonResponse	109.797	0.734356	0.309666	0.623401	-1.88278
CGGA_1015	nonResponse	147.866	1	0.43083	0.902813	-1.81891
CGGA_1008	nonResponse	72.0246	0.47078	0.205032	0.38211	-1.7794
CGGA_1375	nonResponse	32.4162	0.194393	0.0899886	0.116813	-1.72795
CGGA_D26	nonResponse	88.3612	0.584778	0.267539	0.526255	-1.63954
CGGA_1091	nonResponse	85.6576	0.565912	0.265472	0.521488	-1.57413
CGGA_1332	nonResponse	45.5515	0.286051	0.149871	0.254906	-1.51252
CGGA_1119	nonResponse	22.7144	0.126693	0.0912943	0.119824	-1.39991
CGGA_1370	nonResponse	42.8398	0.267129	0.155517	0.267926	-1.36434
CGGA_1450	nonResponse	6.13345	0.0109915	0.0449711	0.0130005	-1.35872
CGGA_D35	nonResponse	121.667	0.817186	0.395439	0.8212	-1.34942
CGGA_747	nonResponse	34.4484	0.208574	0.131903	0.213471	-1.34532
CGGA_518	nonResponse	18.6582	0.0983892	0.0915093	0.12032	-1.2663
CGGA_837	nonResponse	63.8188	0.413521	0.23574	0.452924	-1.18524
CGGA_902	nonResponse	55.5024	0.355488	0.213404	0.401416	-1.15497
CGGA_850	nonResponse	73.4947	0.481039	0.269825	0.531527	-1.13381
CGGA_1024	nonResponse	73.7442	0.48278	0.293302	0.585666	-0.890728
CGGA_842	nonResponse	97.3673	0.647622	0.3653	0.751696	-0.885218
CGGA_1070	nonResponse	73.4653	0.480834	0.293766	0.586736	-0.87674
CGGA_1299	nonResponse	48.8697	0.309206	0.22066	0.418148	-0.862633
CGGA_483	nonResponse	105.06	0.701299	0.391585	0.812311	-0.853028
CGGA_1272	nonResponse	30.6053	0.181756	0.168762	0.29847	-0.826578
CGGA_374	nonResponse	17.4086	0.0896697	0.133905	0.218088	-0.772281
CGGA_1271	nonResponse	46.6214	0.293517	0.222378	0.42211	-0.771467
CGGA_1035	Response	87.2477	0.577008	0.346392	0.708094	-0.7599
CGGA_604	Response	108.263	0.723653	0.410173	0.855176	-0.757876
CGGA_1129	nonResponse	37.7483	0.2316	0.198412	0.366843	-0.74062
CGGA_274	nonResponse	54.2227	0.346558	0.249278	0.484143	-0.729758
CGGA_1394	Response	19.9558	0.107444	0.146873	0.247991	-0.716012
CGGA_1045	nonResponse	82.6967	0.545251	0.338944	0.690919	-0.692252
CGGA_1177	nonResponse	104.302	0.696014	0.406396	0.846466	-0.670059
CGGA_499	Response	33.7358	0.203601	0.193205	0.354836	-0.666425
CGGA_D09	Response	36.0586	0.219809	0.201794	0.374643	-0.649732
CGGA_1170	nonResponse	27.8392	0.162455	0.178773	0.321556	-0.629933
CGGA_669	Response	4.55829	0	0.112447	0.168603	-0.585852
CGGA_1039	nonResponse	28.8932	0.169809	0.186594	0.339591	-0.580386
CGGA_318	Response	84.3358	0.556688	0.357007	0.732573	-0.55207
CGGA_D34	nonResponse	36.381	0.222059	0.216019	0.407445	-0.507995
CGGA_876	nonResponse	121.216	0.814037	0.472974	1	-0.505319
CGGA_D02	Response	55.4512	0.355131	0.276361	0.546599	-0.479781
CGGA_1381	nonResponse	22.1985	0.123094	0.177445	0.318493	-0.461541
CGGA_1283	nonResponse	10.7984	0.0435437	0.145668	0.245213	-0.43245
CGGA_1083	Response	103.737	0.692068	0.430909	0.902995	-0.389504
CGGA_719	nonResponse	50.4288	0.320085	0.270093	0.532144	-0.384249
CGGA_1338	Response	56.0772	0.359499	0.289402	0.576671	-0.360532
CGGA_1023	Response	22.7671	0.127062	0.196603	0.362673	-0.274988
CGGA_1007	nonResponse	34.5658	0.209393	0.233776	0.448395	-0.259259
CGGA_1077	nonResponse	82.676	0.545106	0.380386	0.786487	-0.248223
CGGA_1214	nonResponse	26.7446	0.154816	0.215735	0.406792	-0.199071
CGGA_822	Response	12.2959	0.0539932	0.172085	0.306132	-0.198316
CGGA_1049	nonResponse	46.1661	0.29034	0.274928	0.543294	-0.194528
CGGA_1175	nonResponse	24.68	0.140409	0.210544	0.39482	-0.187775
CGGA_1409	Response	19.5323	0.104489	0.19557	0.360291	-0.181321
CGGA_1073	nonResponse	50.1292	0.317994	0.289797	0.577582	-0.163757
CGGA_272	nonResponse	73.185	0.478878	0.359939	0.739333	-0.159729
CGGA_525	nonResponse	92.1816	0.611437	0.417609	0.872324	-0.157728
CGGA_848	nonResponse	57.2284	0.367533	0.313012	0.631119	-0.145209
CGGA_1320	Response	21.6411	0.119204	0.207938	0.388812	-0.117271
CGGA_1240	nonResponse	86.7469	0.573513	0.415043	0.866407	-0.00923883
CGGA_1026	nonResponse	36.101	0.220105	0.262951	0.515675	0.00317036
CGGA_1227	nonResponse	31.9436	0.191095	0.25227	0.491043	0.0234832
CGGA_1053	nonResponse	62.7537	0.406088	0.346338	0.707969	0.0324511
CGGA_1068	nonResponse	44.8686	0.281286	0.29286	0.584647	0.0393173
CGGA_1384	nonResponse	17.33	0.0891214	0.210325	0.394315	0.0478201
CGGA_1197	Response	17.2219	0.0883667	0.212506	0.399346	0.07466
CGGA_1237	nonResponse	25.5536	0.146505	0.237891	0.457884	0.0765135
CGGA_1011	Response	78.1799	0.513732	0.40034	0.832501	0.110797
CGGA_D03	nonResponse	48.3227	0.305389	0.31072	0.625833	0.11857
CGGA_1072	nonResponse	47.9034	0.302463	0.314943	0.63557	0.177315
CGGA_1019	Response	61.9735	0.400644	0.358051	0.734981	0.183019
CGGA_676	Response	73.0345	0.477827	0.392669	0.81481	0.195295
CGGA_1475	nonResponse	40.326	0.249587	0.29747	0.595276	0.235685
CGGA_1180	nonResponse	40.9626	0.254029	0.299982	0.601071	0.241958
CGGA_1342	Response	56.4601	0.362171	0.347861	0.71148	0.25248
CGGA_1460	nonResponse	25.1686	0.143819	0.253466	0.493801	0.255601
CGGA_1313	Response	59.5409	0.383669	0.357504	0.733719	0.255918
CGGA_1109	nonResponse	13.8927	0.0651355	0.219827	0.416227	0.26075
CGGA_624	Response	71.028	0.463826	0.395042	0.820283	0.285637
CGGA_1285	Response	59.0633	0.380337	0.359132	0.737474	0.288797
CGGA_802	Response	49.4715	0.313405	0.331195	0.673049	0.300425
CGGA_1275	nonResponse	41.3876	0.256995	0.307221	0.617764	0.305644
CGGA_899	nonResponse	29.3273	0.172838	0.270877	0.533951	0.30724
CGGA_761	Response	38.1674	0.234525	0.297978	0.596448	0.310997
CGGA_878	nonResponse	51.3051	0.3262	0.337789	0.688254	0.311608
CGGA_494	Response	6.5137	0.0136449	0.20229	0.375786	0.312012
CGGA_1324	nonResponse	15.9175	0.0792649	0.232165	0.44468	0.327201
CGGA_413	Response	33.4594	0.201672	0.285578	0.567853	0.330751
CGGA_D57	Response	34.5265	0.209118	0.292326	0.583414	0.3684
CGGA_731	nonResponse	47.9154	0.302546	0.334439	0.68053	0.385509
CGGA_680	nonResponse	10.9771	0.0447902	0.223456	0.424597	0.393967
CGGA_1216	nonResponse	37.6656	0.231023	0.307633	0.618714	0.430541
CGGA_759	Response	37.8945	0.232621	0.310008	0.624189	0.44853
CGGA_1219	Response	13.7888	0.0644106	0.23798	0.45809	0.458323
CGGA_700	Response	14.4818	0.0692467	0.243455	0.470716	0.494462
CGGA_1346	nonResponse	54.2142	0.346499	0.364938	0.750862	0.507884
CGGA_1251	nonResponse	27.1974	0.157976	0.29132	0.581094	0.594894
CGGA_1287	nonResponse	22.6034	0.125919	0.278292	0.551051	0.604239
CGGA_1234	Response	55.8976	0.358246	0.379435	0.784292	0.608478
CGGA_491	Response	11.6739	0.0496529	0.245681	0.475849	0.609173
CGGA_859	Response	52.2699	0.332932	0.372553	0.768423	0.652297
CGGA_773	Response	11.2506	0.0466991	0.250827	0.487716	0.677933
CGGA_1188	Response	23.4181	0.131604	0.288778	0.575233	0.690049
CGGA_782	Response	44.9212	0.281653	0.35402	0.725684	0.691914
CGGA_1393	Response	35.2474	0.214149	0.327167	0.663759	0.717797
CGGA_1124	nonResponse	58.6256	0.377282	0.405841	0.845188	0.802671
CGGA_1139	Response	12.4932	0.0553702	0.266502	0.523864	0.805402
CGGA_1105	Response	43.9217	0.274678	0.371112	0.7651	0.907132
CGGA_D37	nonResponse	46.253	0.290946	0.378612	0.782396	0.911901
CGGA_789	nonResponse	53.6553	0.342599	0.40195	0.836213	0.921938
CGGA_1074	Response	53.7258	0.343091	0.405331	0.84401	0.955832
CGGA_658	Response	35.839	0.218277	0.351769	0.720494	0.961849
CGGA_1114	nonResponse	57.2887	0.367954	0.419624	0.876972	0.993403
CGGA_1412	Response	19.956	0.107445	0.317182	0.640733	1.106
CGGA_1314	nonResponse	25.535	0.146376	0.334588	0.680874	1.11161
CGGA_1258	nonResponse	29.3028	0.172667	0.348607	0.713201	1.13961
CGGA_1116	Response	17.7235	0.0918667	0.316274	0.638639	1.16855
CGGA_1099	Response	35.5207	0.216056	0.372571	0.768465	1.1947
CGGA_679	Response	43.882	0.274401	0.401435	0.835027	1.23282
CGGA_D51	Response	47.9366	0.302694	0.421529	0.881363	1.31653
CGGA_1224	nonResponse	62.1983	0.402213	0.464761	0.98106	1.31736
CGGA_1136	Response	32.315	0.193687	0.374412	0.772709	1.31817
CGGA_1270	Response	25.4337	0.145669	0.358387	0.735755	1.36949
CGGA_342	Response	18.6301	0.0981932	0.350851	0.718378	1.50913
CGGA_1218	Response	30.4087	0.180384	0.397505	0.825963	1.62694
CGGA_545	Response	25.3448	0.145049	0.38672	0.801092	1.67548
CGGA_D30	Response	22.8255	0.127468	0.381669	0.789444	1.70301
CGGA_804	Response	18.1017	0.0945061	0.375602	0.775454	1.79102
CGGA_1301	Response	17.762	0.0921357	0.375404	0.774997	1.7999
CGGA_1001	nonResponse	47.3737	0.298766	0.472376	0.99862	1.87873
CGGA_1078	Response	30.2868	0.179533	0.421905	0.882232	1.89193
CGGA_808	Response	22.2648	0.123556	0.400861	0.833703	1.92648
CGGA_1171	Response	41.5169	0.257898	0.467744	0.987939	2.01878
CGGA_710	Response	25.0801	0.143202	0.429144	0.898924	2.13792

## Sheet: CGGA_693
SAMPLE	TIDE_results	Risk Score	standard Risk Score	Priming Score	standard Priming Score	Therapy Score
CGGA_869	nonResponse	131.817	1	0.328621	0.737027	-3.18349
CGGA_1255	Response	124.209	0.941667	0.306589	0.694509	-3.10182
CGGA_1430	nonResponse	33.0639	0.242839	-0.0532871	0	-3.07952
CGGA_1551	Response	129.873	0.985096	0.358821	0.795308	-2.80557
CGGA_1706	nonResponse	115.119	0.871976	0.3417	0.762267	-2.39206
CGGA_1744	nonResponse	89.5326	0.675798	0.26383	0.61199	-2.15503
CGGA_509	nonResponse	49.2945	0.367283	0.106714	0.308778	-2.12765
CGGA_1736	Response	92.234	0.696511	0.302271	0.686175	-1.87891
CGGA_1713	nonResponse	32.6409	0.239596	0.0787012	0.254718	-1.74745
CGGA_1758	nonResponse	32.7993	0.24081	0.0795201	0.256299	-1.74556
CGGA_1425	nonResponse	25.238	0.182837	0.0589559	0.216613	-1.65112
CGGA_1491	nonResponse	38.7508	0.286442	0.114306	0.323431	-1.63453
CGGA_1807	nonResponse	28.634	0.208874	0.075904	0.24932	-1.61668
CGGA_1142	nonResponse	37.126	0.273984	0.116682	0.328016	-1.54652
CGGA_1740	nonResponse	28.088	0.204688	0.0811236	0.259393	-1.54304
CGGA_1687	Response	95.6525	0.722721	0.354791	0.787532	-1.49086
CGGA_1462	nonResponse	89.1374	0.672768	0.331646	0.742865	-1.46357
CGGA_1138	nonResponse	33.8261	0.248683	0.113631	0.322129	-1.44628
CGGA_1546	nonResponse	78.6032	0.592	0.296836	0.675687	-1.39339
CGGA_1644	nonResponse	72.9235	0.548452	0.277026	0.637456	-1.36594
CGGA_P199	nonResponse	67.4936	0.50682	0.262677	0.609765	-1.29394
CGGA_1819	nonResponse	47.6698	0.354826	0.187822	0.465306	-1.25503
CGGA_2056	Response	82.2127	0.619675	0.325926	0.731827	-1.2464
CGGA_1392	nonResponse	63.0429	0.472695	0.251497	0.58819	-1.22914
CGGA_1603	Response	52.3986	0.391083	0.209209	0.50658	-1.22912
CGGA_1694	nonResponse	53.3119	0.398086	0.213411	0.514688	-1.22342
CGGA_1529	nonResponse	21.3704	0.153183	0.0865776	0.269919	-1.22273
CGGA_1134	nonResponse	65.7952	0.493798	0.267373	0.618827	-1.17991
CGGA_1595	nonResponse	30.6321	0.224194	0.130647	0.354966	-1.15025
CGGA_1976	nonResponse	55.6282	0.415845	0.232233	0.551013	-1.12755
CGGA_1354	nonResponse	47.1816	0.351083	0.202929	0.49446	-1.08516
CGGA_1604	nonResponse	44.437	0.330039	0.19257	0.474468	-1.07973
CGGA_P596	nonResponse	24.9569	0.180681	0.121538	0.337388	-1.01633
CGGA_1391	nonResponse	44.5738	0.331089	0.200439	0.489654	-1.00673
CGGA_1870	nonResponse	7.78364	0.0490096	0.0545964	0.208199	-1.0035
CGGA_1612	Response	68.7459	0.516422	0.300412	0.682588	-0.967479
CGGA_1702	nonResponse	25.468	0.1846	0.12848	0.350784	-0.967386
CGGA_1656	nonResponse	34.545	0.254195	0.165429	0.422091	-0.958545
CGGA_1103	nonResponse	35.3254	0.260179	0.170971	0.432787	-0.934215
CGGA_1560	nonResponse	26.8566	0.195246	0.140987	0.37492	-0.897727
CGGA_1946	nonResponse	60.416	0.452555	0.276021	0.635517	-0.880745
CGGA_2106	nonResponse	18.2645	0.129369	0.108822	0.312848	-0.878078
CGGA_1624	nonResponse	37.1734	0.274348	0.184217	0.458348	-0.875388
CGGA_1773	nonResponse	59.2854	0.443886	0.272418	0.628565	-0.87188
CGGA_1478	nonResponse	29.5356	0.215787	0.15425	0.400516	-0.871624
CGGA_1564	Response	39.0282	0.288569	0.193262	0.475805	-0.858678
CGGA_1866	nonResponse	33.7204	0.247873	0.173902	0.438441	-0.841467
CGGA_1912	Response	53.745	0.401407	0.255362	0.595648	-0.822502
CGGA_1538	nonResponse	35.522	0.261686	0.182999	0.455998	-0.822138
CGGA_1785	nonResponse	28.9412	0.21123	0.159055	0.409789	-0.800203
CGGA_1461	nonResponse	36.2731	0.267445	0.196857	0.482743	-0.71377
CGGA_1208	Response	71.1089	0.53454	0.337163	0.753512	-0.694796
CGGA_P102	Response	30.0321	0.219594	0.174365	0.439335	-0.690825
CGGA_1282	Response	17.4115	0.122829	0.12504	0.344145	-0.68269
CGGA_1164	nonResponse	12.8202	0.087626	0.108077	0.311409	-0.669954
CGGA_1548	nonResponse	44.9529	0.333995	0.24142	0.568742	-0.613336
CGGA_1426	nonResponse	39.9592	0.295707	0.221694	0.530674	-0.612205
CGGA_1749	nonResponse	34.4921	0.25379	0.200101	0.489003	-0.610933
CGGA_1820	nonResponse	29.2489	0.213589	0.180092	0.450388	-0.602742
CGGA_1611	nonResponse	15.5752	0.108749	0.126201	0.346385	-0.598418
CGGA_2024	nonResponse	3.4365	0.015679	0.0803198	0.257842	-0.575042
CGGA_1690	nonResponse	54.8539	0.409908	0.286088	0.654946	-0.560201
CGGA_1505	Response	61.1184	0.45794	0.311713	0.704398	-0.552865
CGGA_1641	nonResponse	33.6348	0.247217	0.204129	0.496775	-0.536853
CGGA_P335	nonResponse	19.5255	0.139037	0.152756	0.397634	-0.490182
CGGA_1541	nonResponse	23.8671	0.172326	0.171775	0.434338	-0.472541
CGGA_1985	nonResponse	16.0397	0.112311	0.140729	0.374422	-0.472031
CGGA_1613	Response	68.45	0.514153	0.349145	0.776635	-0.470119
CGGA_1735	Response	6.41269	0.0384982	0.105291	0.306032	-0.44403
CGGA_1764	Response	19.1944	0.136499	0.160135	0.411873	-0.403544
CGGA_P609	nonResponse	28.4744	0.207651	0.197024	0.483064	-0.403341
CGGA_139	Response	6.10526	0.0361411	0.109728	0.314595	-0.38764
CGGA_P411	nonResponse	33.3936	0.245368	0.218366	0.524252	-0.385418
CGGA_1387	nonResponse	28.2522	0.205947	0.198511	0.485934	-0.379726
CGGA_1326	nonResponse	44.4166	0.329883	0.263394	0.61115	-0.373119
CGGA_1886	nonResponse	32.4682	0.238272	0.217834	0.523224	-0.354089
CGGA_831	nonResponse	30.2734	0.221444	0.210166	0.508427	-0.343595
CGGA_1586	Response	58.948	0.441299	0.324819	0.72969	-0.33633
CGGA_1496	nonResponse	10.3659	0.0688085	0.132085	0.357741	-0.33353
CGGA_1833	nonResponse	28.4467	0.207438	0.204046	0.496616	-0.332266
CGGA_2053	Response	3.10145	0.0131101	0.104111	0.303756	-0.324682
CGGA_1420	Response	9.08294	0.0589716	0.12895	0.351691	-0.313974
CGGA_1729	nonResponse	24.3702	0.176183	0.192454	0.474245	-0.286385
CGGA_1955	Response	7.66803	0.0481232	0.126943	0.347818	-0.277955
CGGA_1596	Response	29.4848	0.215397	0.213884	0.515601	-0.275329
CGGA_1901	nonResponse	61.1788	0.458403	0.339936	0.758864	-0.273997
CGGA_1698	nonResponse	53.5278	0.399741	0.310229	0.701534	-0.267122
CGGA_P22	nonResponse	26.4723	0.1923	0.203817	0.496173	-0.25638
CGGA_1371	nonResponse	35.3549	0.260405	0.239533	0.5651	-0.252135
CGGA_1106	nonResponse	56.4771	0.422354	0.323921	0.727956	-0.247449
CGGA_1815	Response	47.4327	0.353009	0.292137	0.666619	-0.206097
CGGA_1403	nonResponse	35.6127	0.262381	0.246031	0.57764	-0.197585
CGGA_1451	nonResponse	53.9528	0.403	0.319021	0.7185	-0.196337
CGGA_1814	nonResponse	41.6512	0.30868	0.272365	0.628461	-0.174235
CGGA_1382	nonResponse	20.4929	0.146454	0.18843	0.466479	-0.172975
CGGA_1017	Response	4.36489	0.0227973	0.124394	0.342898	-0.172582
CGGA_1708	nonResponse	43.776	0.324972	0.281766	0.646604	-0.164673
CGGA_1480	Response	52.397	0.391071	0.31648	0.713597	-0.16006
CGGA_P106	nonResponse	34.0874	0.250687	0.245037	0.575723	-0.147098
CGGA_1697	nonResponse	22.5078	0.161903	0.199177	0.48722	-0.145646
CGGA_1534	nonResponse	22.154	0.159191	0.198776	0.486446	-0.135639
CGGA_P295	Response	29.466	0.215253	0.228287	0.543398	-0.131044
CGGA_P109	nonResponse	31.8242	0.233334	0.238283	0.562689	-0.124798
CGGA_1256	nonResponse	21.1053	0.15115	0.198674	0.486248	-0.0951368
CGGA_1559	nonResponse	15.8539	0.110886	0.178156	0.446653	-0.0916888
CGGA_1770	nonResponse	23.3041	0.168009	0.208091	0.504422	-0.0883504
CGGA_1501	Response	41.2809	0.305841	0.279851	0.642909	-0.0849661
CGGA_P28	Response	38.1981	0.282204	0.268207	0.620438	-0.0789464
CGGA_P385	Response	8.81192	0.0568937	0.154678	0.401343	-0.0468527
CGGA_1908	nonResponse	28.7665	0.20989	0.235111	0.556567	-0.0353483
CGGA_1634	nonResponse	43.1022	0.319805	0.292824	0.667945	-0.0277933
CGGA_1492	nonResponse	46.6344	0.346888	0.307083	0.695463	-0.0255444
CGGA_P143	Response	55.2607	0.413027	0.343547	0.765832	-0.00370369
CGGA_1537	nonResponse	36.2611	0.267353	0.268186	0.620397	-0.00247234
CGGA_1631	nonResponse	42.8482	0.317858	0.294711	0.671585	0.00105729
CGGA_1130	nonResponse	19.2466	0.136899	0.201161	0.491048	0.00323915
CGGA_1260	nonResponse	27.4311	0.199651	0.234612	0.555603	0.0125462
CGGA_1036	nonResponse	32.3442	0.237321	0.254909	0.594774	0.0202986
CGGA_1429	nonResponse	9.6127	0.0630334	0.164773	0.420825	0.0220452
CGGA_P100	nonResponse	18.6343	0.132204	0.20071	0.490177	0.0229823
CGGA_P15	nonResponse	22.763	0.16386	0.217851	0.523258	0.0303403
CGGA_1750	Response	12.1812	0.0827268	0.176694	0.443831	0.0391528
CGGA_1452	nonResponse	49.6375	0.369913	0.326659	0.73324	0.0506325
CGGA_1953	nonResponse	34.0589	0.250468	0.265181	0.614597	0.0547719
CGGA_1444	nonResponse	24.9107	0.180327	0.229393	0.545531	0.0603256
CGGA_1135	Response	35.1127	0.258548	0.272603	0.62892	0.0870122
CGGA_1681	Response	39.6277	0.293165	0.29079	0.664019	0.0894966
CGGA_P585	nonResponse	47.4537	0.35317	0.323508	0.72716	0.105696
CGGA_P280	Response	6.75893	0.0411529	0.162583	0.416598	0.113208
CGGA_1826	nonResponse	19.2078	0.136601	0.212121	0.512199	0.113993
CGGA_1727	Response	12.4372	0.0846894	0.186698	0.463137	0.128714
CGGA_1840	nonResponse	10.377	0.0688937	0.178733	0.447765	0.130899
CGGA_2039	Response	6.94554	0.0425837	0.165305	0.421852	0.132949
CGGA_777	Response	49.8753	0.371737	0.33617	0.751596	0.136
CGGA_1709	nonResponse	33.5183	0.246323	0.272464	0.628652	0.148753
CGGA_P401	nonResponse	32.7228	0.240224	0.271927	0.627616	0.174896
CGGA_1539	Response	8.5021	0.0545182	0.175899	0.442296	0.17689
CGGA_P99	nonResponse	18.5346	0.13144	0.21723	0.522059	0.191564
CGGA_1597	Response	52.1136	0.388898	0.352061	0.782264	0.205749
CGGA_P87	Response	20.1631	0.143926	0.225218	0.537474	0.206689
CGGA_487	Response	34.654	0.255031	0.282799	0.648597	0.206781
CGGA_1041	Response	7.98982	0.0505904	0.177235	0.444873	0.210484
CGGA_1433	nonResponse	39.8748	0.29506	0.304519	0.690513	0.216525
CGGA_1865	Response	36.788	0.271393	0.292544	0.667404	0.219407
CGGA_P625	nonResponse	45.4874	0.338093	0.327118	0.734127	0.219522
CGGA_1419	Response	18.4554	0.130832	0.220284	0.527953	0.225136
CGGA_1441	nonResponse	49.1047	0.365828	0.342412	0.763641	0.228714
CGGA_P160	nonResponse	69.6311	0.523209	0.425191	0.923393	0.240959
CGGA_120	nonResponse	25.3483	0.183682	0.250137	0.585564	0.249725
CGGA_1571	Response	20.6515	0.14767	0.231688	0.54996	0.25183
CGGA_P89	Response	51.8101	0.386571	0.35938	0.796389	0.290701
CGGA_1535	nonResponse	64.7756	0.485981	0.411611	0.897185	0.297865
CGGA_530	nonResponse	34.2025	0.25157	0.291318	0.665039	0.309557
CGGA_1605	Response	7.69456	0.0483266	0.186404	0.46257	0.313556
CGGA_1769	Response	3.86666	0.0189772	0.171648	0.434093	0.318061
CGGA_1337	Response	7.29795	0.0452857	0.188259	0.466149	0.347739
CGGA_1899	Response	19.9551	0.142331	0.240222	0.56643	0.364446
CGGA_1911	Response	18.7016	0.132721	0.235978	0.55824	0.371785
CGGA_1476	nonResponse	13.518	0.0929761	0.215957	0.519602	0.377497
CGGA_P182	nonResponse	59.0905	0.442391	0.397342	0.869649	0.38076
CGGA_1410	Response	27.2977	0.198629	0.271454	0.626703	0.384978
CGGA_P512	nonResponse	26.4243	0.191932	0.268257	0.620534	0.387701
CGGA_2115	nonResponse	9.18683	0.0597682	0.202595	0.493815	0.415818
CGGA_1776	nonResponse	14.1753	0.0980162	0.223055	0.533301	0.42221
CGGA_1257	Response	9.95029	0.0656218	0.207364	0.503019	0.43312
CGGA_1626	Response	46.4588	0.345542	0.354837	0.78762	0.457293
CGGA_1659	Response	46.8155	0.348276	0.356933	0.791666	0.464062
CGGA_1402	nonResponse	44.6705	0.33183	0.350355	0.778971	0.483436
CGGA_1817	Response	29.2004	0.213217	0.291656	0.665691	0.510972
CGGA_1558	nonResponse	24.2652	0.175377	0.27267	0.62905	0.517162
CGGA_1500	nonResponse	17.3417	0.122293	0.246351	0.578258	0.529
CGGA_P112	Response	7.35067	0.0456899	0.206887	0.502098	0.531286
CGGA_1543	Response	37.6349	0.277886	0.330153	0.739984	0.560665
CGGA_1457	nonResponse	41.8079	0.309882	0.347251	0.772981	0.565839
CGGA_1572	Response	29.8146	0.217926	0.30032	0.68241	0.572989
CGGA_2075	nonResponse	28.1573	0.205219	0.294009	0.670232	0.575721
CGGA_P283	nonResponse	22.8004	0.164147	0.272832	0.629363	0.576773
CGGA_P415	Response	48.3218	0.359826	0.374615	0.82579	0.580634
CGGA_1699	Response	1.7413	0.00268154	0.191307	0.47203	0.598113
CGGA_2082	Response	48.258	0.359336	0.376276	0.828995	0.599716
CGGA_1812	nonResponse	28.5184	0.207988	0.297907	0.677754	0.600266
CGGA_1236	Response	4.14273	0.0210939	0.201091	0.490913	0.600543
CGGA_1353	nonResponse	25.4374	0.184365	0.289775	0.66206	0.641211
CGGA_P116	Response	6.69842	0.040689	0.216036	0.519755	0.648291
CGGA_1728	Response	29.6034	0.216307	0.313331	0.70752	0.711013
CGGA_1248	Response	11.1327	0.0746878	0.241518	0.56893	0.72666
CGGA_1075	nonResponse	30.8115	0.22557	0.319891	0.720179	0.728553
CGGA_1521	Response	23.3709	0.168521	0.292523	0.667364	0.750419
CGGA_1172	Response	30.8355	0.225754	0.324192	0.72848	0.770469
CGGA_1601	Response	36.5072	0.26924	0.34673	0.771974	0.77051
CGGA_1380	Response	26.1932	0.19016	0.30656	0.694454	0.778562
CGGA_568	Response	21.1913	0.151809	0.290332	0.663136	0.81488
CGGA_1472	nonResponse	15.3972	0.107385	0.270044	0.623982	0.842098
CGGA_1467	Response	3.64693	0.0172925	0.223817	0.534772	0.84665
CGGA_2062	nonResponse	29.9936	0.219298	0.328942	0.737648	0.851142
CGGA_1972	nonResponse	29.5405	0.215824	0.327326	0.734529	0.852977
CGGA_1857	nonResponse	38.9898	0.288274	0.369436	0.815795	0.898501
CGGA_1635	Response	1.39156	0	0.221431	0.530166	0.912165
CGGA_1682	Response	26.4457	0.192096	0.331609	0.742794	1.01819
CGGA_1520	Response	12.6067	0.0859893	0.277288	0.637962	1.02477
CGGA_1663	nonResponse	35.6925	0.262994	0.375596	0.827683	1.09044
CGGA_1811	nonResponse	33.4444	0.245756	0.36736	0.811789	1.09737
CGGA_P610	Response	5.49833	0.0314876	0.256684	0.598199	1.10088
CGGA_1615	Response	11.5137	0.0776086	0.28166	0.646399	1.11161
CGGA_2078	Response	24.1479	0.174478	0.333688	0.746806	1.12988
CGGA_P7	nonResponse	52.2431	0.389891	0.447257	0.965977	1.14929
CGGA_1422	Response	14.0863	0.0973334	0.298148	0.678219	1.17407
CGGA_1678	Response	18.5835	0.131815	0.316345	0.713337	1.17736
CGGA_1780	Response	8.63069	0.0555042	0.278554	0.640406	1.19481
CGGA_1365	Response	13.1099	0.0898472	0.299668	0.681152	1.22787
CGGA_1650	Response	7.43172	0.0463114	0.277274	0.637935	1.22952
CGGA_1767	Response	13.767	0.0948852	0.305121	0.691677	1.25621
CGGA_P180	Response	19.1494	0.136154	0.327722	0.735293	1.26833
CGGA_1486	Response	18.5877	0.131847	0.326726	0.733371	1.28065
CGGA_1542	Response	2.75629	0.0104637	0.269245	0.62244	1.33462
CGGA_1658	Response	36.6296	0.270178	0.404243	0.882968	1.33882
CGGA_P136	Response	3.98538	0.0198875	0.274888	0.63333	1.34219
CGGA_2008	Response	16.7687	0.1179	0.327108	0.734108	1.35647
CGGA_2003	Response	9.12453	0.0592905	0.301122	0.683958	1.40015
CGGA_1507	nonResponse	19.1431	0.136105	0.345655	0.769901	1.44729
CGGA_1494	Response	2.83561	0.0110719	0.286498	0.655736	1.50342
CGGA_1378	Response	6.41816	0.0385401	0.304726	0.690913	1.54322
CGGA_P178	Response	2.07821	0.00526469	0.29141	0.665215	1.58235
CGGA_P205	Response	10.4581	0.0695153	0.328852	0.737473	1.6237
CGGA_1086	Response	23.9957	0.173312	0.388966	0.853485	1.68678
CGGA_2047	Response	19.1876	0.136446	0.373969	0.824543	1.72769
CGGA_1262	Response	20.1533	0.143851	0.38706	0.849807	1.81992
CGGA_P619	Response	20.7458	0.148394	0.392788	0.86086	1.85353
CGGA_P164	Response	12.0453	0.0816847	0.361149	0.799801	1.88271
CGGA_1418	Response	8.24764	0.0525672	0.355683	0.789254	1.9786
CGGA_1415	Response	35.5664	0.262026	0.464886	1	1.98525
CGGA_1503	Response	14.6335	0.101529	0.381766	0.83959	1.9857
CGGA_P25	Response	25.0653	0.181513	0.426299	0.925532	2.01647
CGGA_1666	Response	9.06963	0.0588696	0.36406	0.805419	2.02954
CGGA_1481	Response	6.30018	0.0376356	0.353965	0.785937	2.03858
CGGA_P175	Response	10.0903	0.0666951	0.369637	0.816182	2.0447
CGGA_1722	Response	8.45186	0.054133	0.406884	0.888064	2.48076

## Sheet: GSE16011
SAMPLE	TIDE_results	Risk Score	standard Risk Score	Priming Score	standard Priming Score	Therapy Score
GSM405475	nonResponse	7.88307	0.322583	0.0294283	0.120138	-3.25151
GSM405349	nonResponse	7.86628	0.315845	0.0473772	0.161438	-2.93309
GSM405235	Response	9.57131	1	0.367738	0.898586	-2.58181
GSM405392	nonResponse	8.3073	0.492806	0.149682	0.396841	-2.54569
GSM405246	nonResponse	7.24232	0.0654743	-0.0227832	0	-2.34358
GSM405220	nonResponse	8.24161	0.466448	0.160069	0.420741	-2.21255
GSM405323	nonResponse	7.79138	0.285792	0.0905791	0.260846	-2.07494
GSM405370	nonResponse	7.39776	0.127849	0.0258791	0.111972	-2.01482
GSM405218	nonResponse	8.92832	0.741994	0.313588	0.773986	-1.69752
GSM405369	nonResponse	7.46966	0.156698	0.059515	0.189367	-1.69303
GSM405255	Response	8.44024	0.546149	0.233618	0.589976	-1.61906
GSM405230	nonResponse	8.34735	0.508878	0.221205	0.561415	-1.56133
GSM405239	nonResponse	9.03419	0.784478	0.354342	0.867762	-1.35752
GSM405446	nonResponse	8.07006	0.397613	0.188389	0.485906	-1.32431
GSM405264	Response	8.38236	0.522924	0.243145	0.611898	-1.3198
GSM405236	nonResponse	8.5181	0.577391	0.267319	0.667522	-1.31213
GSM405447	Response	8.97023	0.758812	0.346427	0.84955	-1.30811
GSM405454	nonResponse	8.83905	0.706176	0.330646	0.813239	-1.1999
GSM405221	nonResponse	8.54545	0.588365	0.285196	0.708656	-1.11221
GSM405463	nonResponse	9.04079	0.787124	0.371759	0.907839	-1.1094
GSM405434	nonResponse	7.58658	0.203611	0.118888	0.325983	-1.09842
GSM405231	nonResponse	7.86632	0.315861	0.175192	0.455538	-0.983706
GSM405474	Response	8.32375	0.499408	0.255684	0.64075	-0.972677
GSM405412	Response	8.41669	0.536699	0.274085	0.683092	-0.939193
GSM405393	nonResponse	8.34106	0.506352	0.262557	0.656566	-0.913865
GSM405431	nonResponse	7.58481	0.202901	0.131138	0.354172	-0.906861
GSM405418	nonResponse	7.22763	0.0595813	0.0696051	0.212585	-0.895375
GSM405375	nonResponse	8.50567	0.572405	0.29304	0.726707	-0.886768
GSM405324	Response	8.73485	0.664362	0.333317	0.819383	-0.882003
GSM405448	nonResponse	9.03098	0.78319	0.38563	0.939755	-0.871766
GSM405374	nonResponse	8.8991	0.730269	0.367566	0.898191	-0.796483
GSM405389	Response	7.50123	0.169364	0.123847	0.337394	-0.795771
GSM405455	nonResponse	8.49461	0.567967	0.302202	0.747789	-0.717605
GSM405302	nonResponse	7.84524	0.3074	0.192625	0.495653	-0.661721
GSM405280	nonResponse	8.55161	0.590838	0.317803	0.783687	-0.631253
GSM405436	nonResponse	7.65903	0.232684	0.162439	0.426195	-0.626865
GSM405263	nonResponse	8.29559	0.488107	0.275272	0.685823	-0.598993
GSM405352	nonResponse	7.42583	0.13911	0.125698	0.341653	-0.566995
GSM405304	nonResponse	8.02572	0.37982	0.231344	0.584745	-0.551207
GSM405282	Response	8.77312	0.679722	0.362549	0.886646	-0.537955
GSM405308	Response	7.62358	0.21846	0.163267	0.4281	-0.51995
GSM405290	nonResponse	8.27898	0.481443	0.279452	0.695441	-0.491065
GSM405253	nonResponse	7.89604	0.327786	0.213825	0.544433	-0.47351
GSM405362	nonResponse	7.98058	0.361708	0.228615	0.578464	-0.472779
GSM405373	nonResponse	8.45137	0.550614	0.31073	0.76741	-0.472518
GSM405353	nonResponse	8.4779	0.561261	0.315932	0.779381	-0.463739
GSM405391	nonResponse	7.98956	0.365313	0.230969	0.583881	-0.460766
GSM405301	nonResponse	8.25509	0.471856	0.278758	0.693843	-0.438105
GSM405438	nonResponse	8.00122	0.369991	0.237756	0.599498	-0.388261
GSM405294	nonResponse	7.60669	0.211682	0.169471	0.442375	-0.380394
GSM405372	nonResponse	7.65609	0.231502	0.180533	0.467829	-0.343055
GSM405415	nonResponse	7.85901	0.312925	0.2163	0.550127	-0.337252
GSM405442	Response	8.68265	0.64342	0.360275	0.881413	-0.332004
GSM405397	nonResponse	7.71505	0.25516	0.191982	0.494172	-0.325254
GSM405385	Response	7.96529	0.355573	0.235625	0.594596	-0.325184
GSM405376	nonResponse	7.65851	0.232474	0.189213	0.487801	-0.217108
GSM405432	nonResponse	7.81604	0.295686	0.217403	0.552665	-0.206154
GSM405216	Response	7.29302	0.0858182	0.130823	0.353446	-0.13557
GSM405443	nonResponse	7.75214	0.270044	0.211559	0.539219	-0.125313
GSM405427	nonResponse	7.77393	0.278786	0.216796	0.551269	-0.10339
GSM405234	nonResponse	7.33703	0.103477	0.140924	0.376689	-0.0985561
GSM405241	Response	8.24032	0.465931	0.298859	0.740096	-0.0922363
GSM405293	nonResponse	8.10621	0.412118	0.275504	0.686357	-0.09175
GSM405471	Response	8.54102	0.586588	0.355985	0.871542	-0.0207218
GSM405479	Response	8.80024	0.690604	0.402431	0.978415	-0.00178368
GSM405416	Response	8.37166	0.518631	0.330464	0.812819	0.0404845
GSM405248	Response	8.13363	0.42312	0.289102	0.717644	0.0427189
GSM405271	nonResponse	7.70116	0.249587	0.214506	0.546001	0.0552405
GSM405299	nonResponse	7.61128	0.213524	0.199001	0.510323	0.0577957
GSM405262	nonResponse	7.54322	0.186212	0.188677	0.486569	0.0813768
GSM405307	nonResponse	8.51939	0.577909	0.361046	0.883189	0.114009
GSM405240	Response	7.87269	0.318414	0.25014	0.627994	0.142512
GSM405232	nonResponse	7.243	0.0657484	0.140969	0.376792	0.152216
GSM405223	nonResponse	7.43529	0.142907	0.175246	0.455664	0.163571
GSM405260	nonResponse	7.75945	0.272979	0.232462	0.587316	0.174049
GSM405247	nonResponse	7.64098	0.22544	0.211975	0.540176	0.176692
GSM405252	Response	7.91174	0.334086	0.259286	0.649038	0.178123
GSM405320	nonResponse	8.14965	0.429548	0.301113	0.745282	0.183309
GSM405350	Response	7.62339	0.218384	0.211196	0.538384	0.211585
GSM405313	Response	8.28447	0.483648	0.326824	0.804443	0.21686
GSM405422	nonResponse	7.95312	0.35069	0.270504	0.674851	0.23917
GSM405477	Response	8.17518	0.439792	0.310213	0.766221	0.254201
GSM405363	Response	7.871	0.317737	0.259231	0.648912	0.285657
GSM405470	Response	8.12127	0.41816	0.30341	0.750567	0.293823
GSM405229	nonResponse	7.74023	0.265264	0.238672	0.601605	0.319904
GSM405305	Response	8.50699	0.572934	0.374954	0.91519	0.359116
GSM405215	nonResponse	7.56392	0.194519	0.210975	0.537875	0.366403
GSM405365	Response	7.7625	0.274202	0.245721	0.617825	0.368173
GSM405419	nonResponse	7.65469	0.230941	0.229044	0.579453	0.400577
GSM405315	Response	7.26682	0.0753062	0.162736	0.426877	0.420859
GSM405465	nonResponse	7.67307	0.238316	0.234002	0.590862	0.42732
GSM405309	nonResponse	7.96814	0.356717	0.286603	0.711896	0.444773
GSM405237	Response	8.54773	0.589279	0.389912	0.949608	0.478914
GSM405330	Response	7.37185	0.11745	0.186473	0.481497	0.503562
GSM405266	nonResponse	7.69819	0.248395	0.243793	0.613388	0.50983
GSM405275	Response	7.67823	0.240387	0.240893	0.606716	0.518683
GSM405267	nonResponse	7.30336	0.0899662	0.176638	0.458867	0.535732
GSM405426	nonResponse	7.83058	0.30152	0.269503	0.672548	0.549828
GSM405371	nonResponse	7.91697	0.336182	0.284697	0.707508	0.551808
GSM405405	nonResponse	7.45375	0.150313	0.204422	0.522798	0.559487
GSM405297	Response	7.76732	0.276137	0.259539	0.649621	0.566109
GSM405473	Response	7.9759	0.359829	0.297485	0.736935	0.590119
GSM405312	nonResponse	7.31907	0.0962707	0.184492	0.476939	0.613733
GSM405238	Response	7.87869	0.320824	0.282466	0.702376	0.619589
GSM405214	Response	8.30991	0.493854	0.358186	0.876608	0.62756
GSM405452	nonResponse	7.77438	0.278967	0.271847	0.677941	0.735074
GSM405464	Response	7.82305	0.298499	0.281023	0.699055	0.745561
GSM405296	nonResponse	7.39291	0.125901	0.206024	0.526483	0.745731
GSM405244	Response	7.64653	0.227669	0.250382	0.62855	0.747716
GSM405453	Response	8.32608	0.500341	0.369647	0.902979	0.759362
GSM405326	nonResponse	7.54604	0.187347	0.234797	0.59269	0.777295
GSM405274	nonResponse	7.78051	0.281427	0.276306	0.688201	0.786781
GSM405292	nonResponse	7.70431	0.25085	0.265763	0.663942	0.828654
GSM405254	Response	7.76831	0.276533	0.276998	0.689794	0.829782
GSM405458	nonResponse	7.43351	0.14219	0.219102	0.556576	0.837231
GSM405322	nonResponse	8.24478	0.467721	0.360932	0.882924	0.842653
GSM405472	Response	7.93489	0.343376	0.307354	0.759644	0.849708
GSM405440	Response	8.17111	0.438158	0.348984	0.855432	0.856382
GSM405466	Response	8.00857	0.372938	0.320877	0.79076	0.860007
GSM405328	nonResponse	7.68575	0.243406	0.264818	0.661768	0.863591
GSM405368	Response	7.5979	0.208156	0.249523	0.626575	0.863966
GSM405317	nonResponse	8.22074	0.458073	0.358447	0.877208	0.86872
GSM405459	Response	8.17067	0.437984	0.350468	0.858849	0.880182
GSM405217	nonResponse	8.1171	0.416488	0.341293	0.837736	0.882723
GSM405222	Response	7.07914	0	0.161816	0.424762	0.906015
GSM405303	nonResponse	7.60818	0.212281	0.254855	0.638844	0.91795
GSM405243	nonResponse	7.87823	0.320638	0.302403	0.748251	0.924914
GSM405337	nonResponse	7.36147	0.113287	0.213452	0.543575	0.942644
GSM405228	Response	7.76101	0.273604	0.283686	0.705182	0.951197
GSM405356	Response	7.57908	0.200603	0.25304	0.634667	0.96767
GSM405251	Response	7.20266	0.0495628	0.190314	0.490335	1.01214
GSM405219	nonResponse	7.88545	0.323537	0.309516	0.764617	1.01418
GSM405242	nonResponse	7.67877	0.240603	0.275656	0.686706	1.04748
GSM405367	nonResponse	7.88907	0.324987	0.317064	0.781985	1.11969
GSM405249	Response	7.25733	0.0714991	0.20933	0.53409	1.15677
GSM405340	Response	7.46253	0.153838	0.248079	0.623252	1.20199
GSM405213	nonResponse	7.84725	0.308208	0.315873	0.779244	1.21274
GSM405270	nonResponse	8.05886	0.393116	0.355372	0.870132	1.25239
GSM405224	nonResponse	7.52363	0.178351	0.262422	0.656254	1.25826
GSM405233	Response	8.22098	0.458168	0.386341	0.941391	1.29353
GSM405379	Response	7.8543	0.311037	0.324565	0.799245	1.32657
GSM405345	Response	8.00331	0.370828	0.350557	0.859052	1.32668
GSM405461	Response	7.5134	0.174249	0.266664	0.666016	1.35016
GSM405351	Response	7.68102	0.241509	0.296066	0.73367	1.35278
GSM405314	nonResponse	7.52501	0.178906	0.269382	0.672271	1.36075
GSM405276	Response	8.14202	0.426487	0.377486	0.921016	1.36848
GSM405430	nonResponse	8.17873	0.441218	0.39258	0.955747	1.50104
GSM405278	nonResponse	7.95312	0.35069	0.382302	0.932098	1.94436
GSM405268	Response	8.07991	0.401565	0.411812	1	2.05723

## Sheet: IMvigor 210
SAMPLE	Patients' response	Risk Score	standard Risk Score	Priming Score	standard Priming Score	Therapy Score
SAMc0da5d48686d	PD	11.7647	1	0.253415	0.366104	-3.92724
SAM563d6233dfa2	PD	6.36099	0.518667	0.208355	0.254081	-2.30402
SAM7b40007f4aa4	PR	3.40667	0.255513	0.106154	0	-2.26414
SAMc57eadb2d82b	PD	4.64693	0.365989	0.174504	0.169924	-2.00285
SAM6964a6d7b967	PD	5.11942	0.408075	0.19177	0.212849	-1.99916
SAM54e58f1b0230	PD	3.35525	0.250933	0.130297	0.0600223	-1.9802
SAMf82bbdc267c8	PD	3.47257	0.261383	0.137935	0.0790094	-1.94268
SAM5d1dfd5207f5	PD	3.39799	0.25474	0.143423	0.0926541	-1.8535
SAM07a93a28f801	PR	7.30066	0.602368	0.284991	0.444606	-1.8345
SAM4305ab968b90	PD	3.9343	0.302511	0.176148	0.174012	-1.70588
SAM1ac4e3dee297	PD	3.85922	0.295824	0.176201	0.174143	-1.67591
SAMdb3f50c9129c	PD	5.22039	0.417069	0.225406	0.296471	-1.67115
SAMbc8dc3a7b54e	PD	4.77141	0.377076	0.210788	0.260129	-1.65511
SAM7c67b05aa109	SD	2.39591	0.165481	0.127934	0.0541466	-1.63043
SAM3a1c9632ff7b	SD	3.57968	0.270924	0.170491	0.159948	-1.62886
SAM7114d99032ec	PD	4.87704	0.386486	0.221819	0.287553	-1.57593
SAM81b71522417a	PD	1.9145	0.122599	0.115678	0.0236775	-1.57588
SAM187e056d6a2a	PD	5.73831	0.463203	0.254701	0.369302	-1.55381
SAMae02629a97f7	PD	4.39929	0.34393	0.213473	0.266806	-1.48007
SAM58e7832f4e7d	PR	2.85426	0.206307	0.159742	0.133225	-1.46231
SAM85f0a3ac1c45	PD	2.52394	0.176885	0.148464	0.105188	-1.45622
SAM09c84ec0cf34	PD	4.40297	0.344258	0.217693	0.277296	-1.43541
SAM94859b440b1d	PD	3.76583	0.287505	0.197293	0.226579	-1.40888
SAM822b226466a1	SD	2.4431	0.169684	0.156259	0.124566	-1.33939
SAM49f9b2e57aa5	PD	4.38354	0.342527	0.226222	0.2985	-1.3346
SAMb3c02294aba7	PR	4.05585	0.313339	0.21529	0.271321	-1.32577
SAMd027124354ce	CR	4.59729	0.361567	0.235903	0.322569	-1.3125
SAM23095936e611	PD	3.29589	0.245645	0.192918	0.215704	-1.27269
SAM7893196e0e89	PD	5.09319	0.405739	0.25738	0.375962	-1.27197
SAMe07c4560772d	PD	1.47781	0.0837014	0.128183	0.0547655	-1.26827
SAM8533e5e261d6	PR	3.30063	0.246068	0.197142	0.226204	-1.2284
SAM08cce2fa88f2	SD	2.44213	0.169597	0.166554	0.150161	-1.22652
SAM6cb230f208a8	PR	3.90172	0.299609	0.219036	0.280635	-1.22449
SAM0684af734db1	PR	3.17154	0.234569	0.194016	0.218433	-1.21201
SAMe50d15fde368	PR	2.20445	0.148426	0.16021	0.134388	-1.20279
SAMaec7380f9ab0	PR	2.22411	0.150177	0.163401	0.142322	-1.17562
SAMf28c01545593	SD	1.8796	0.119491	0.151535	0.112822	-1.1704
SAM6dd7ad1d797d	PD	8.64876	0.722449	0.394621	0.717156	-1.16436
SAM87a8e18eb45b	PD	2.781	0.199782	0.185615	0.197549	-1.15091
SAM110501d0eedb	PD	6.09656	0.495114	0.305206	0.494862	-1.1422
SAMaabf4afe4213	PD	5.11643	0.407809	0.271614	0.411349	-1.12553
SAM5234688806a7	PD	2.87817	0.208438	0.191818	0.212968	-1.12118
SAM9daccafc18db	PD	5.16714	0.412326	0.274264	0.417938	-1.11642
SAMf2aae1443f67	PD	3.05266	0.22398	0.200867	0.235466	-1.0906
SAMb419a8fcbfcd	PR	1.18696	0.0577941	0.134526	0.070535	-1.08509
SAMd215b503f99a	SD	5.37588	0.43092	0.287506	0.450858	-1.05345
SAM5cc2d9036053	PD	4.87186	0.386024	0.276964	0.42465	-0.971319
SAM075e037d95bc	PR	1.53207	0.0885346	0.157953	0.128777	-0.964213
SAM4b7ea015fd9e	PD	1.65942	0.0998776	0.162623	0.140387	-0.963038
SAM6792d6e98068	PD	2.01414	0.131474	0.175886	0.173359	-0.956992
SAM0bdb3428bd13	PD	6.50768	0.531734	0.338228	0.576959	-0.942313
SAM5cfa1699bdb7	PD	6.17587	0.502178	0.327647	0.550654	-0.928024
SAM36d87392593b	SD	5.0412	0.401108	0.287737	0.451433	-0.9199
SAM28e6031ac18b	SD	1.14176	0.0537675	0.149004	0.10653	-0.909185
SAM59fda9035d1d	PD	5.66563	0.456729	0.313098	0.514484	-0.887238
SAM0f956e757453	PD	6.05005	0.490971	0.327114	0.549329	-0.884589
SAM9539a4f19ebc	SD	2.39982	0.165829	0.199879	0.233009	-0.845812
SAM29da928587ad	PD	4.43346	0.346974	0.272977	0.414739	-0.843244
SAM8f2275c36e8c	SD	3.36467	0.251773	0.235102	0.320578	-0.838669
SAM12502d970c10	SD	3.8557	0.29551	0.253089	0.365295	-0.834368
SAM5b57e47fdcb3	PD	4.5209	0.354762	0.277004	0.424749	-0.833477
SAM2c9586161ce6	PD	1.75007	0.107952	0.177946	0.178481	-0.831095
SAM14df63a65411	PR	4.10914	0.318085	0.262928	0.389756	-0.826077
SAM1c8b086175ca	PD	4.62118	0.363695	0.281959	0.437069	-0.81859
SAM49d48750e294	PD	4.46769	0.350023	0.27727	0.42541	-0.80974
SAMbcbc7957c264	PD	2.75492	0.197459	0.216237	0.273676	-0.806096
SAM1f66db567eb5	PR	6.80989	0.558653	0.362217	0.636598	-0.798498
SAMba7176afe070	PD	2.07516	0.13691	0.192674	0.215097	-0.797435
SAM7d7c54623618	PR	2.0295	0.132843	0.19183	0.212999	-0.78878
SAM670649e105b5	CR	5.9513	0.482174	0.335445	0.57004	-0.754896
SAMfd947610629d	PD	4.85632	0.38464	0.296963	0.47437	-0.7467
SAM032c642382a7	PD	8.46837	0.706382	0.426445	0.796275	-0.745982
SAM52500cabdd36	SD	1.64907	0.0989559	0.183995	0.19352	-0.725455
SAMe3d4266775a9	PD	3.11214	0.229278	0.237149	0.325666	-0.717436
SAM1f83ebd6be9b	PD	1.64253	0.0983737	0.187958	0.203372	-0.679593
SAMdad5c29dc105	PD	2.59552	0.18326	0.222888	0.290212	-0.671003
SAM2e7aa8fa0ab3	PD	4.26891	0.332317	0.283159	0.440052	-0.667562
SAM468a9e1dc821	PD	3.53902	0.267303	0.257672	0.376689	-0.660307
SAM1ab1b28d9f2b	PD	2.78302	0.199962	0.230696	0.309623	-0.659099
SAM8a1b0e02ee42	CR	2.2389	0.151495	0.211544	0.262008	-0.655352
SAM6780ed436b55	PD	5.66518	0.456688	0.334915	0.568722	-0.648672
SAM548551ef782c	PR	1.86705	0.118373	0.200811	0.235327	-0.627043
SAM25510f300d79	CR	2.8188	0.203149	0.235291	0.321048	-0.622891
SAMa1871f491b02	PD	2.09483	0.138662	0.210358	0.259061	-0.611901
SAM025b45c27e05	PD	4.4232	0.34606	0.296022	0.47203	-0.587413
SAMe94c30c30616	SD	5.04871	0.401777	0.319425	0.530212	-0.576579
SAMaaf505c36f93	PR	3.36878	0.252138	0.259816	0.382019	-0.570227
SAM26104d5adc89	SD	2.65899	0.188915	0.235387	0.321285	-0.559282
SAM2bba8cb35e48	PD	4.00234	0.308572	0.283816	0.441684	-0.556027
SAMad83c9c53537	PD	4.03837	0.311782	0.288092	0.452317	-0.523398
SAMeff2ce356ccb	PD	1.37304	0.074369	0.193594	0.217384	-0.512497
SAM36851bc8b9ae	SD	3.49983	0.263811	0.269836	0.40693	-0.512044
SAMcc7a42d87e9c	PR	4.04655	0.312511	0.289893	0.456794	-0.506923
SAMc1b27bc16435	PR	3.0542	0.224117	0.255115	0.370332	-0.498434
SAMd86389d0d768	PD	1.54313	0.0895199	0.202945	0.240632	-0.476906
SAM3ee5dcd894f0	PD	4.56712	0.35888	0.312195	0.512237	-0.467041
SAM18039827e1b9	PD	2.8119	0.202534	0.249903	0.357375	-0.460522
SAMce39dd79b441	PD	3.0508	0.223815	0.258776	0.379433	-0.457102
SAM1e9c4d1d39ae	PD	3.73868	0.285087	0.284122	0.442446	-0.449449
SAMe97af0feefdf	PD	3.83306	0.293494	0.287695	0.451328	-0.447364
SAMa535fcdf18a0	PR	1.93663	0.12457	0.22039	0.284003	-0.440338
SAM63b2189c36d7	PD	3.24657	0.241252	0.267489	0.401094	-0.438538
SAM23aa15d4a0b0	PD	3.95966	0.304771	0.295996	0.471964	-0.406226
SAMeb29625f76a5	PD	2.87949	0.208555	0.258033	0.377585	-0.398153
SAMfed609955db9	PD	2.76915	0.198727	0.25476	0.369448	-0.390722
SAM27299aed7681	PR	1.33179	0.0706942	0.20349	0.241987	-0.38821
SAMe5bc41772bc9	PD	4.93539	0.391683	0.33449	0.567666	-0.367596
SAM30b5c6c54cf7	CR	3.57774	0.270751	0.289768	0.456483	-0.324745
SAM31d9176e11fb	CR	4.66006	0.367159	0.32877	0.553444	-0.322311
SAMa90d73f8d891	PD	1.28203	0.0662622	0.207884	0.25291	-0.320717
SAM5767dd75d142	PR	4.64957	0.366224	0.328574	0.552957	-0.320343
SAMb0a83e5fbde9	SD	2.24788	0.152294	0.244159	0.343094	-0.302472
SAMc0ef41aa6c8b	PD	1.88328	0.119818	0.231161	0.310779	-0.301762
SAM7fb7a13c096b	PD	4.52718	0.355322	0.326923	0.548853	-0.290467
SAMb963dda93cfd	PD	4.15974	0.322593	0.315464	0.520364	-0.271829
SAM978a587b207e	PD	5.48236	0.440404	0.363318	0.639335	-0.266733
SAMe712352fb82a	PR	1.91753	0.122869	0.236504	0.324062	-0.256789
SAM065890737112	CR	3.48006	0.26205	0.292864	0.464178	-0.252682
SAM4caabd64e7fd	PR	1.0988	0.0499413	0.207896	0.25294	-0.24885
SAM0a7c2091dd56	PD	4.02257	0.310374	0.312921	0.514042	-0.24591
SAM943df5cf15df	PD	3.5828	0.271202	0.297351	0.475334	-0.24387
SAMae1690469964	SD	2.46888	0.171981	0.260438	0.383565	-0.211113
SAM9725303dce0c	PD	3.82858	0.293095	0.313583	0.515687	-0.162731
SAMe7bcab05402e	SD	4.2642	0.331897	0.329329	0.554834	-0.161218
SAM8e469834acc1	PD	3.00216	0.219482	0.284243	0.442747	-0.159774
SAM6ff654a20f98	CR	4.52633	0.355246	0.339256	0.579514	-0.155368
SAM8e8ef2368dfa	PD	4.25128	0.330746	0.333687	0.56567	-0.108532
SAM9d2494119c05	PD	2.51556	0.176138	0.273208	0.415313	-0.0898475
SAM0d855cff64e6	PD	2.27512	0.154721	0.26532	0.395703	-0.0819078
SAM297c0301e861	PD	5.73915	0.463278	0.390311	0.706441	-0.0723174
SAMb2f1d0e54ece	PR	5.84082	0.472334	0.394621	0.717158	-0.0650182
SAMd1bd63734394	PD	2.97802	0.217331	0.292109	0.462301	-0.0643778
SAMe0c49ea0df5d	SD	4.00137	0.308486	0.329544	0.555368	-0.0559706
SAMd98bac0a070f	PD	2.6637	0.189334	0.281711	0.436451	-0.0549391
SAM7538ad9ff524	SD	3.06505	0.225084	0.296773	0.473897	-0.0474847
SAM62fb1388c871	PD	4.0254	0.310627	0.33142	0.560032	-0.0448798
SAM6d2ae0c39b96	PD	2.23111	0.150801	0.267249	0.400497	-0.0436041
SAM415f36ad349e	PD	5.01624	0.398885	0.367349	0.649355	-0.0402038
SAM80c6183220e6	PD	4.67778	0.368736	0.355351	0.619527	-0.0387941
SAM7d2dfba6cd84	SD	6.88568	0.565404	0.434535	0.816388	-0.0379447
SAMc0d625a50eb8	SD	4.30001	0.335087	0.341894	0.586072	-0.0379381
SAM2b672f4336c7	SD	2.11457	0.14042	0.264191	0.392895	-0.0313909
SAM557dde1b9f3e	PD	3.49497	0.263379	0.313676	0.515921	-0.0310967
SAM1a87df750b9d	SD	3.63252	0.275631	0.318824	0.528717	-0.0287046
SAMe41b1e773582	PD	2.3251	0.159173	0.272473	0.413486	-0.0233121
SAMba1a34b5a060	PD	4.00857	0.309127	0.333583	0.565411	-0.0146483
SAM19fec8f3b3bd	PD	2.92846	0.212917	0.295465	0.470645	-0.00829882
SAMdab9ca8fb5de	PD	3.07791	0.226229	0.301202	0.484907	-0.00412502
SAM5d989c86255e	PD	2.38621	0.164617	0.277142	0.425093	0.00377717
SAM2624229effe8	PD	3.95423	0.304287	0.333873	0.566132	0.00979383
SAM63405b04ab2d	PD	4.52807	0.355401	0.35474	0.618008	0.0131424
SAM681e4bf7cf85	PR	2.41251	0.166959	0.279852	0.43183	0.0230924
SAMb4c7a001537d	PD	2.2254	0.150293	0.273671	0.416463	0.0288066
SAM6157c8f38b72	PR	3.89679	0.29917	0.33407	0.566622	0.0344354
SAMe9ae8beb82fa	PD	3.99356	0.30779	0.338014	0.576425	0.0396397
SAM572f19794c96	CR	3.73541	0.284796	0.329528	0.555329	0.0479814
SAMbcb07ba81cee	PD	2.47488	0.172515	0.284432	0.443216	0.0487214
SAM73663ee4a96e	CR	4.83942	0.383134	0.37001	0.655972	0.0581115
SAMee3844cc0b9f	PD	6.8989	0.566582	0.44437	0.840837	0.0643375
SAM2070b416069c	SD	2.03001	0.132889	0.27091	0.409599	0.075133
SAMc1251c7bfee2	PR	1.94568	0.125376	0.26819	0.402836	0.0784256
SAMb8101c538753	SD	4.18766	0.325079	0.34904	0.603837	0.0841309
SAMb470eb8f04be	CR	2.21953	0.14977	0.280637	0.433781	0.10722
SAMd4c0837b0997	PD	2.2205	0.149856	0.280882	0.43439	0.109518
SAMd135d5867fe3	PD	5.5467	0.446135	0.400178	0.730973	0.110856
SAMcabb6d58ff55	SD	4.37439	0.341712	0.359365	0.629508	0.123854
SAMd2492b2a31bb	PD	4.20998	0.327068	0.353755	0.615559	0.126912
SAM1fa6bcb7fc48	PD	2.13862	0.142562	0.281328	0.4355	0.146456
SAM5a2347c0498a	SD	1.96077	0.12672	0.275825	0.421817	0.155946
SAMda4d892fddc8	PD	4.23612	0.329396	0.358278	0.626805	0.166107
SAM675a12a09c15	PD	2.79374	0.200917	0.306884	0.499033	0.169215
SAM3b15b4c6311d	CR	3.79733	0.290311	0.342889	0.588545	0.169732
SAM6662f5181f87	PD	3.26689	0.243063	0.325339	0.544916	0.185643
SAM39eb94fa504d	PD	3.26368	0.242777	0.326447	0.54767	0.199003
SAM0a0f2bac4b20	PD	3.18947	0.236166	0.323913	0.541369	0.200364
SAM8884fe446d20	PR	5.93692	0.480894	0.422892	0.787441	0.206274
SAM3894ac3956a5	PD	2.7692	0.198731	0.309531	0.505615	0.207752
SAM9cafb905b36a	PD	6.51373	0.532273	0.443797	0.839412	0.208878
SAM1dda30f1c5be	PD	4.23603	0.329388	0.362435	0.637139	0.211566
SAM28687037e4ff	SD	5.04806	0.401719	0.391998	0.710636	0.216691
SAM18be5b395318	PD	1.71824	0.105118	0.273144	0.415154	0.221607
SAM2f228939632f	PD	4.37042	0.341359	0.368476	0.652158	0.224961
SAMeb587a68006b	SD	3.22187	0.239052	0.327462	0.550194	0.226467
SAMabc151b01ea3	PD	3.11378	0.229424	0.324686	0.543293	0.238452
SAM65afda25b920	SD	5.34996	0.428611	0.40512	0.743258	0.241874
SAM76a431ba6ce1	PD	4.42402	0.346133	0.373328	0.664221	0.256994
SAM97a00e0929fb	PR	1.77407	0.11009	0.278839	0.429311	0.261975
SAMffa5c7cad0e5	PR	4.95329	0.393278	0.393397	0.714113	0.269072
SAMdcae54fcd7fa	SD	4.11367	0.318489	0.363592	0.640015	0.27211
SAM0257bbbbd388	SD	1.80227	0.112603	0.280938	0.434529	0.27387
SAMe7e4f7c076a7	PD	5.40639	0.433637	0.41031	0.756161	0.276498
SAM91c47b054ffb	PR	3.28244	0.244448	0.334602	0.567943	0.280765
SAMa321770ac31c	PD	3.11267	0.229325	0.329522	0.555316	0.291731
SAM9306c5c92444	PD	3.05062	0.223798	0.327733	0.550868	0.296473
SAM568ce160abd9	SD	1.946	0.125405	0.289169	0.454992	0.307541
SAM5c139c5c1c4f	PD	1.40804	0.0774869	0.270785	0.409289	0.317274
SAMae4da274eded	PD	3.87926	0.297609	0.360281	0.631784	0.327705
SAMbe83eae4026e	PD	2.13001	0.141796	0.298713	0.478719	0.339786
SAM5e3bae090b8c	PD	2.23859	0.151467	0.303031	0.489456	0.344465
SAM14938611a2d3	PR	2.22486	0.150244	0.303242	0.48998	0.352146
SAMe9475f77504b	SD	2.659	0.188915	0.319038	0.52925	0.354781
SAMbf1a3ae828e6	CR	3.46274	0.260508	0.348727	0.603059	0.364521
SAMf3a9bce50099	PD	3.87036	0.296816	0.363478	0.639732	0.366123
SAM7829a341b9f3	PD	1.92601	0.123624	0.295773	0.47141	0.38753
SAM9a2cf3c06fb3	PD	4.46455	0.349744	0.386792	0.697694	0.388253
SAM18bc1078bc15	PD	2.34376	0.160835	0.311289	0.509985	0.393523
SAM9aa6a095a9d6	PD	2.93416	0.213424	0.33361	0.565477	0.406282
SAM2dc3f04e45e9	PD	5.54525	0.446006	0.427337	0.798492	0.408188
SAMa424c75831b4	PD	1.49906	0.0855941	0.282402	0.43817	0.408583
SAM18a4dabbc557	PD	2.99683	0.219007	0.34042	0.582408	0.456159
SAMb8070b7937e7	SD	1.16148	0.0555242	0.279681	0.431405	0.511012
SAM6083aac8db99	PR	3.46425	0.260642	0.364214	0.641563	0.533166
SAMc692536a795a	PD	3.54122	0.267499	0.367257	0.649128	0.536282
SAM31f41dd0d6ca	SD	3.79191	0.289829	0.376356	0.671749	0.537558
SAMbfdffb97c446	SD	3.05273	0.223986	0.351287	0.609424	0.553019
SAMd636e3461955	PD	5.69351	0.459212	0.446696	0.84662	0.561679
SAM753d4bb52dbe	SD	2.44497	0.16985	0.331716	0.560768	0.577106
SAM3e8baff50d7a	SD	3.31347	0.247212	0.362841	0.638148	0.577185
SAMcc4675f394a1	PD	2.71836	0.194202	0.341674	0.585526	0.578887
SAM961d04c42bd9	PD	2.44552	0.169899	0.334036	0.566537	0.602245
SAMcf018fee2acd	PD	2.7142	0.193832	0.343943	0.591167	0.60531
SAM7f0d9cc7f001	PD	3.89307	0.298839	0.386969	0.698133	0.613919
SAM2570ff4aae6e	PR	3.435	0.258037	0.371321	0.65923	0.62227
SAM61baf919bb01	SD	4.09294	0.316643	0.399912	0.730311	0.677099
SAM0ce9c983b20f	PD	3.93128	0.302242	0.394367	0.716524	0.679798
SAM1abf01dd4544	PR	2.58044	0.181918	0.346453	0.597405	0.685097
SAM2e9ac0b1b250	CR	2.85247	0.206148	0.357278	0.624319	0.696892
SAM4501e41e4751	PD	3.01734	0.220834	0.363931	0.640858	0.705037
SAM7bff231634e9	SD	1.35211	0.0725046	0.306494	0.498065	0.729369
SAM5fe7a81a39dd	PD	2.82398	0.203611	0.361012	0.633603	0.748846
SAMf275eb859a39	PR	1.80771	0.113087	0.326065	0.54672	0.764854
SAMb15ac6e4c4ef	PR	2.3237	0.159049	0.345702	0.595539	0.777411
SAM716f54e468f4	SD	3.40924	0.255742	0.385914	0.695509	0.791813
SAM61b9d4d84c64	SD	1.80831	0.113141	0.329679	0.555705	0.804106
SAMe56c96c51190	PD	4.83185	0.38246	0.438125	0.825311	0.805367
SAMaf42c1541269	SD	4.33426	0.338138	0.420968	0.782658	0.812702
SAM1c0ecfb3eb63	PD	3.62879	0.275299	0.396518	0.721874	0.821735
SAMd697ba701077	SD	1.91706	0.122827	0.338294	0.577121	0.855663
SAM59f392864f5d	SD	2.8229	0.203514	0.372478	0.662107	0.874556
SAM34430ef08e5b	PD	3.13792	0.231575	0.384442	0.691851	0.881955
SAMfb7aec7cb0e2	PR	3.69896	0.281549	0.405727	0.744768	0.894888
SAMd43f8933066b	PR	3.71195	0.282706	0.408217	0.750958	0.91701
SAM4b0175e8db6e	PD	2.75189	0.197189	0.373984	0.665851	0.918811
SAMc6eff056c89a	PD	1.84663	0.116554	0.343178	0.589265	0.936611
SAMa1e62d323e1d	SD	1.90452	0.12171	0.345933	0.596115	0.944055
SAMdee1011782cd	PD	3.8273	0.292981	0.416085	0.770518	0.957822
SAM7aa01fc49a80	PD	2.84564	0.20554	0.381978	0.685724	0.969456
SAM3e04eb914f3d	PR	3.44743	0.259144	0.404465	0.74163	0.979577
SAM9410b866974a	SD	4.73177	0.373546	0.452204	0.860313	0.99839
SAMe1eb5d988760	CR	3.18718	0.235963	0.399147	0.728409	1.02335
SAM9e11ec6bea80	SD	2.17164	0.145504	0.364392	0.642005	1.04117
SAM3cb94b0d5297	PD	2.40843	0.166596	0.373353	0.664284	1.04639
SAMe7bf6c015192	PD	3.49115	0.263039	0.412373	0.76129	1.04887
SAMd7d57ee3a863	CR	3.88767	0.298358	0.427864	0.799802	1.0629
SAM166a419a4e5a	PD	2.43413	0.168885	0.376107	0.671131	1.06642
SAMd3601288319e	CR	2.44709	0.170039	0.376831	0.67293	1.06926
SAM8b4b8b0f9e73	SD	2.6603	0.18903	0.384594	0.69223	1.07061
SAMdf3e42c8672a	PD	1.7558	0.108463	0.353226	0.614246	1.08197
SAM181b638b8248	PD	3.39466	0.254444	0.414513	0.76661	1.11003
SAMeaa477a5384b	CR	2.23802	0.151417	0.374419	0.666932	1.12475
SAM99a46b9eec27	PD	2.6514	0.188238	0.391405	0.709163	1.14852
SAM30cf07d4874f	SD	2.67129	0.19001	0.394966	0.718015	1.17964
SAMa9ca8536d2b1	SD	3.33446	0.249081	0.418816	0.777309	1.18062
SAMe3210d3632b4	PD	3.22989	0.239767	0.416473	0.771483	1.19595
SAM45c8e6412c66	PD	2.63902	0.187136	0.397	0.72307	1.2145
SAMa913c6139ec8	SD	2.57135	0.181108	0.3962	0.721083	1.23226
SAM9fb814c22bdb	SD	3.9869	0.307197	0.448229	0.850431	1.24658
SAM6f2a102a99df	CR	2.73583	0.195759	0.40633	0.746267	1.27855
SAMbda79f955628	SD	3.06251	0.224857	0.418986	0.77773	1.28894
SAMd3bd67996035	CR	3.07247	0.225744	0.420464	0.781406	1.3012
SAM47fc46c3d6be	SD	4.26637	0.332091	0.465812	0.894146	1.3293
SAM553c3c35b847	PD	5.3876	0.431963	0.508391	1	1.35559
SAMcb132b0cdd2c	PD	2.4661	0.171732	0.40383	0.74005	1.35683
SAM6cbc10abddb0	PD	1.41111	0.07776	0.366158	0.646395	1.35822
SAMb0d11db9aa79	PD	1.68302	0.101981	0.377257	0.673988	1.37305
SAM18b9351e265a	PD	3.29198	0.245297	0.438434	0.826081	1.41162
SAM75f12d1a55fc	SD	3.19313	0.236492	0.435025	0.817604	1.41306
SAM771445e92421	CR	2.15364	0.1439	0.398083	0.725764	1.41637
SAM7fb6987514a4	PD	3.07242	0.22574	0.432809	0.812095	1.43611
SAMab8052a03398	SD	3.60795	0.273442	0.459706	0.878963	1.52035
SAMc2a1820d4e6b	CR	2.38267	0.164301	0.416725	0.77211	1.5304
SAMb15ad09d6e24	PD	3.54221	0.267586	0.460522	0.880992	1.55501
SAM75142fcab9df	PD	2.07934	0.137282	0.41236	0.761258	1.60146
SAM36a9225b0222	SD	3.33805	0.249401	0.45788	0.874424	1.60607
SAMf20b827dca51	PD	3.38627	0.253696	0.463726	0.888959	1.65107
SAM203dcf14f927	CR	2.66123	0.189114	0.438239	0.825596	1.65643
SAMd35318127278	CR	0.538133	0	0.363786	0.640497	1.67408
SAMc919aebc7fdd	PR	1.4298	0.0794247	0.401697	0.734748	1.73924
SAM3b1066e5801b	SD	1.80432	0.112785	0.419312	0.778541	1.7851
SAM2eb07dedf07f	PR	2.49648	0.174439	0.458035	0.874811	1.93724
SAM560f23d6a3ad	CR	3.2031	0.23738	0.485927	0.944152	1.96537
SAM727c0e92a2a7	PR	2.58286	0.182133	0.474507	0.915763	2.08342
SAMef0e3d2415fd	SD	2.40047	0.165886	0.504882	0.991277	2.48673
SAM0571f17f4045	SD	1.60336	0.0948844	0.481311	0.932676	2.54124
SAM957378bd907f	PD	1.6476	0.0988254	0.485127	0.942164	2.56562
SAM52e3fa3ad574	PD	1.13504	0.053169	0.468097	0.899826	2.58021
SAMb2e4a082541a	PD	1.39837	0.0766252	0.486237	0.944923	2.67533
SAM3330c03fdf00	PD	0.937235	0.0355498	0.483417	0.937912	2.82505
